# Supplementary material for: Induced pluripotent stem cells of endangered avian species
Source: PubMed Central journal article supplement (PMC9592614; doi:10.1038/s42003-022-03964-y), 2022-10-24
Supplement: 42003_2022_3964_MOESM2_ESM.pdf [file 42003_2022_3964_MOESM2_ESM.pdf]

**Supplementary information****Induced pluripotent stem cells of endangered avian species**

Masafumi Katayama, Tomokazu Fukuda, Takehito Kaneko, Yuki Nakagawa, Atsushi Tajima, Mitsuru Naito, Hitomi Ohmaki, Daiji Endo, Makoto Asano, Takashi Nagamine, Yumiko Nakaya, Keisuke Saito, Yukiko Watanabe, Tetsuya Tani, Miho Inoue-Murayama, Nobuyoshi Nakajima, Manabu Onuma .

**Corresponding authors:**

Masafumi Katayama Ph.D.,  
katayama.masafumi@nies.go.jp

Tomokazu Fukuda, Ph.D.,  
tomofukuda009@gmail.com

Manabu Onuma DVM., Ph.D.,  
E-mail: monuma@nies.go.jp

## Supplemental methods

### *Generation of iPSCs with PB-R6F reprogramming vector.*

PB-R6F reprogramming vectors were transfected into mouse, chicken, Okinawa rail, Japanese ptarmigan, and Blakiston's fish owl-derived fibroblasts using Lipofectamine 2000 transduction reagent (11668019; Thermo Fisher Scientific, Waltham, MA, USA). The PB-R6F reprogramming vector has been described in detail in our previous reports<sup>1,2</sup>. After hygromycin selection (Wako Pure Chemical Industries, Osaka, Japan), transduced cells were reseeded onto a mouse embryonic fibroblast (MEF) feeder layer. Primary iPS cell-like colonies were selected and seeded onto new MEF feeder cell plates.

### *Okinawa rail, Japanese ptarmigan, and Blakiston's fish owl genome and amino acids.*

Nucleic acid sequences derived from Okinawa rail, Japanese ptarmigan, and Blakiston's fish owl DNA were obtained using a next-generation sequencer (HiSeq and IonPGM). To obtain target genes (e.g., *Pou5*, *Sox2*, and *Nanog*), we searched all Okinawa rail, Japanese ptarmigan, and Blakiston's fish owl sequences using Blastn, with chicken mRNA sequences as queries. The sequences obtained were converted into amino acids, and a comparison of mouse, chicken, Okinawa rail, Japanese ptarmigan, and Blakiston's fish owl was performed using the T-Coffee website (<http://tcoffee.vital-it.ch/apps/tcoffee/index.html>).

### Comparison of characteristics of iPSCs with PB-R6F and PB-TAD-7F.

In addition to the PB-TAD-7F reprogramming vector, we used the PB-R6F vector (*M3O*, *Sox2*, *Klf4*, *c-Myc*, *Nanog*, and *Lin28*). There were no observable differences between iPSCs with PB-TAD-7F or PB-R6F in chicken and mouse iPSCs concerning morphology, pluripotency marker staining, and pluripotency-related gene expression (Supplementary Fig. 2 to 4). However, we observed differences between reprogramming vectors in Blakiston's fish owl-derived cells. In brief, the PB-TAD-7F reprogramming vector generated Blakiston's fish owl iPSCs, whereas the PB-R6F reprogramming vector was unable to generate Blakiston's fish owl iPSCs (Supplementary Fig. 2). Therefore, we conclude that the PB-TAD-7F reprogramming vector is more advantageous than the PB-R6F reprogramming vector for generating avian iPSCs. We analyzed the characteristics of iPSCs using the PB-TAD-7F reprogramming vector.

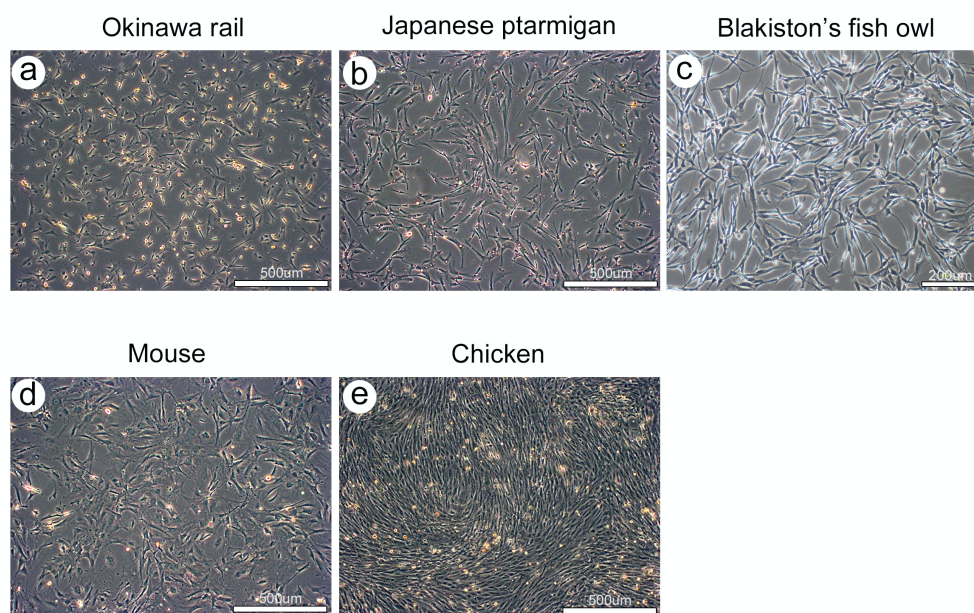

**Supplementary Figure 1. Images of primary cells.**

Images of the primary cells, including Okinawa rail-derived primary cells (a), Japanese ptarmigan-derived primary cells (b), Blakiston's fish owl-derived primary cells (c), mouse-derived primary cells (d), and chicken-derived primary cells (e). Bars represent 200 µm (c) or 500 µm (a, b, d, e).

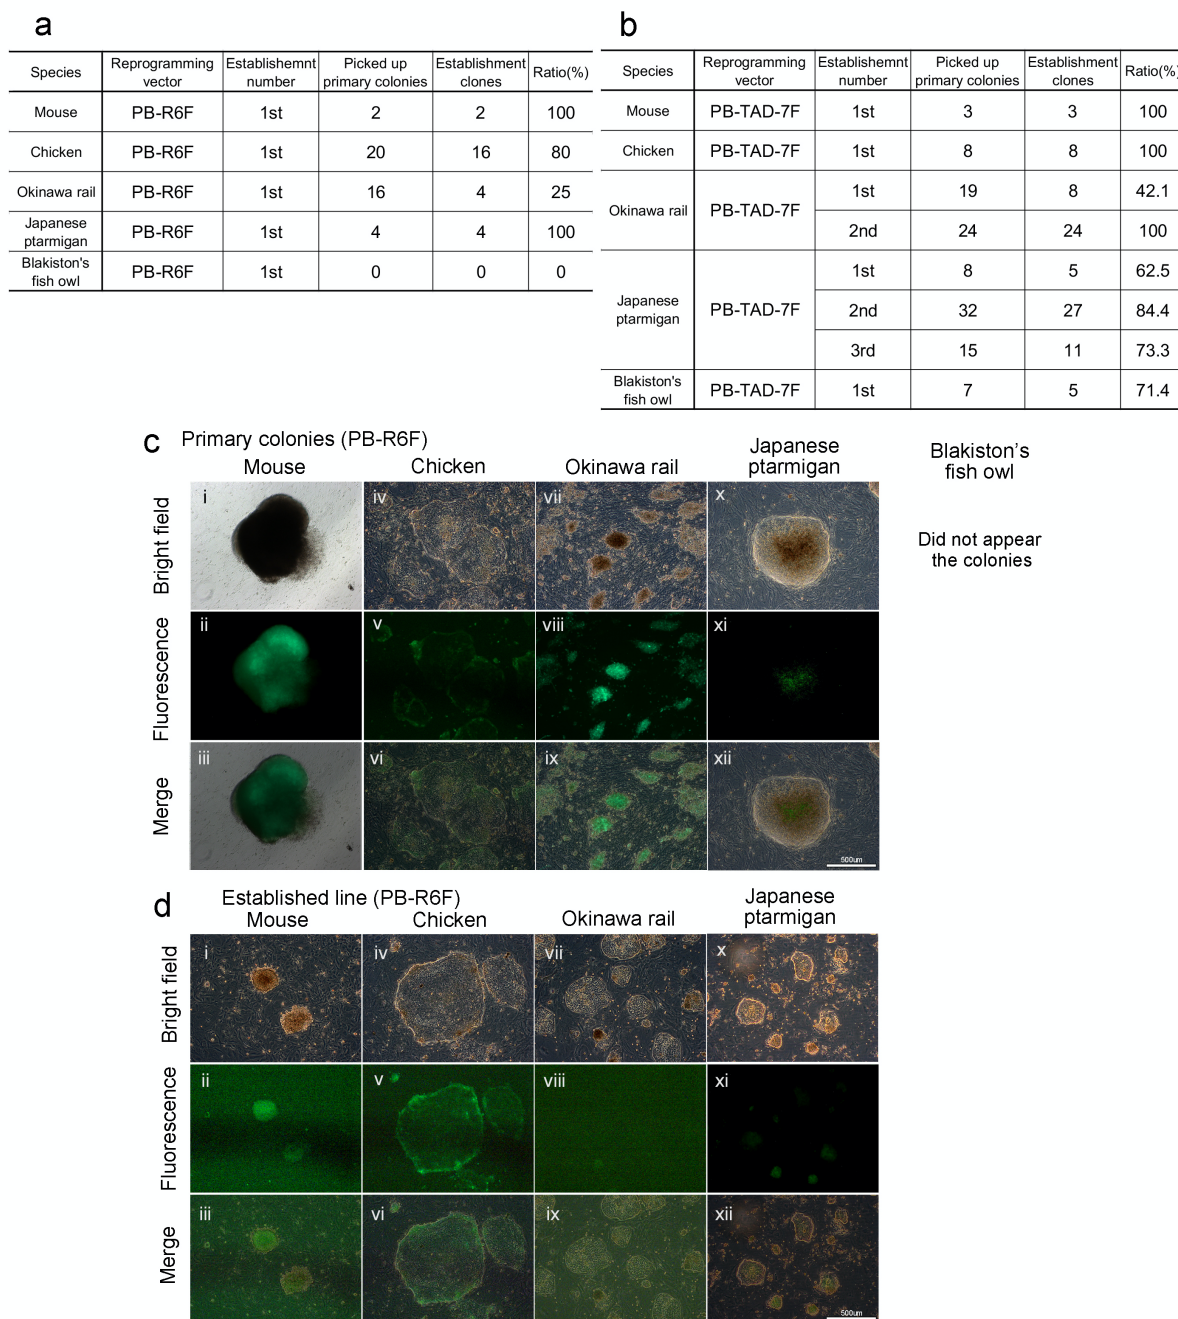

**Supplementary Figure 2. Establishment of iPSCs derived from mouse, chicken, Okinawa rail, Japanese ptarmigan, and Blakiston's fish owl using the PB-R6F vector.**

a,b: Comparison between PB-R6F and PB-TAD-7F reprogramming vectors for the establishment ratio of avian-derived iPSCs. a: PB-R6F, b: PB-TAD-7F.

c: Primary colonies of iPSCs derived from mice, chickens, Okinawa rail, and Japanese ptarmigans. Panels are bright field images (i, iv, vii, and x), green fluorescence protein (GFP) images (ii, v, viii, xi), and merged images (iii, vi, ix, and xii). Panels show mice (i-iii), panels show chickens (iv-vi), Okinawa rail (vii-ix), and Japanese ptarmigans (x-xii). The bars represent 500  $\mu$ m.

d: Morphologies of our established iPS cell lines derived from mouse, chicken, Okinawa rail, and Japanese

ptarmigan. Panels are bright field images (i, iv, vii, and x), green fluorescence protein (GFP) images (ii, v, viii, xi), and merged images (iii, vi, ix, and xii). Panels show mice (i-iii), panels show chickens (iv-vi), Okinawa rail (vii-ix), and Japanese ptarmigans (x-xii). The bars represent 500  $\mu$ m.

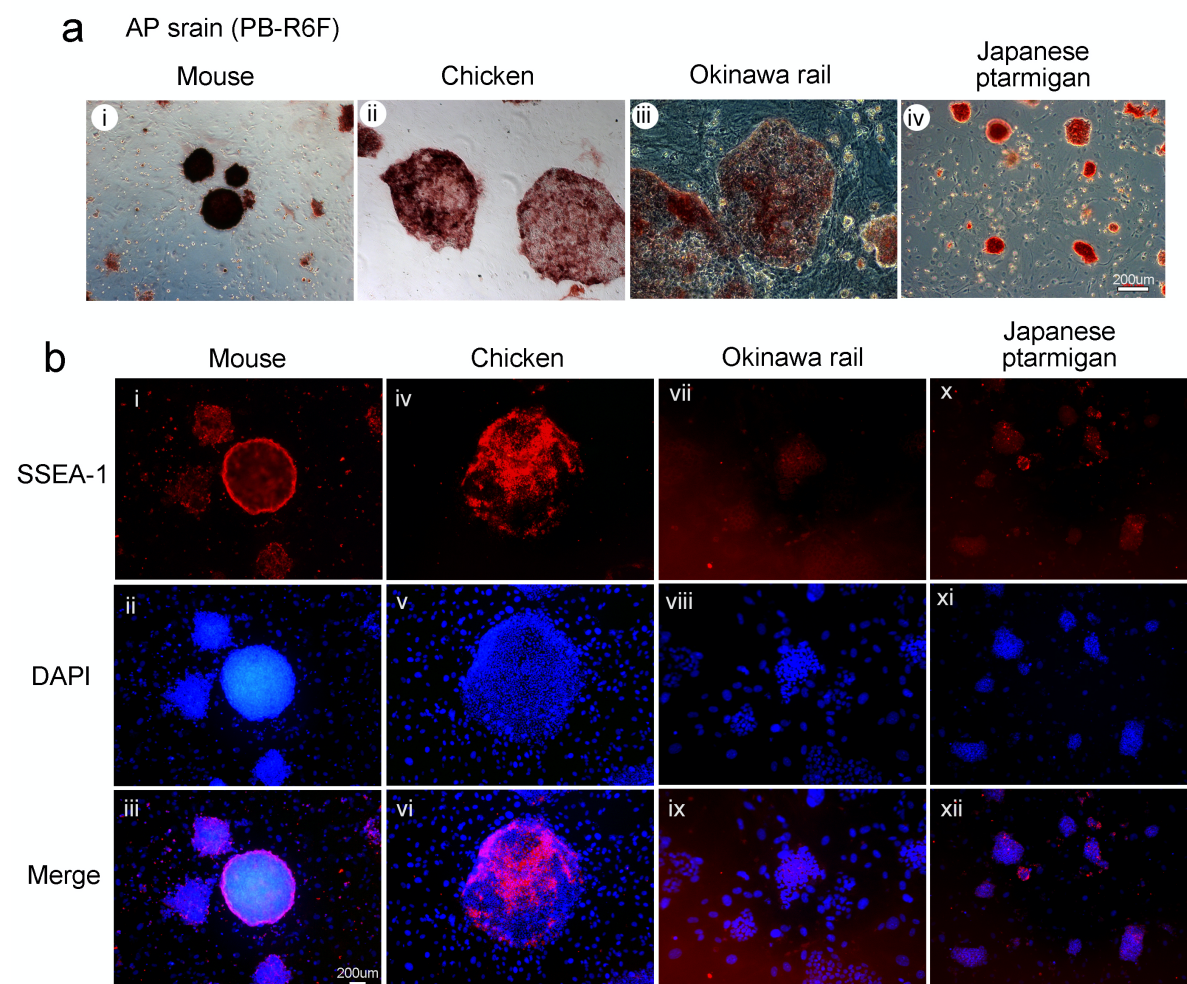

**Supplementary Figure 3. Detection of stem cell markers in our established iPSCs derived from mouse, chicken, Okinawa rail, and Japanese ptarmigan using the PB-R6F reprogramming vector.**

**a:** Alkaline phosphatase (AP) activity in iPSCs derived from mouse (i), chicken (ii), Okinawa rail (iii), and Japanese ptarmigan (iv). The bars represent 200  $\mu$ m.

**b:** Detection of stage-specific embryonic antigen (SSEA)-1 in mouse (i-iii), chicken (iv-vi), Okinawa rail (vii-ix), and Japanese ptarmigan (x-xii). Panels show SSEA-1 images (i, iv, vii, and x), 4',6-diamidino-2-phenylindole (DAPI) images (ii, v, viii, and xi), and merged images (iii, vi, ix, and xii). The bars represent 200  $\mu$ m.

**a** Pluripotency-related transcription factors

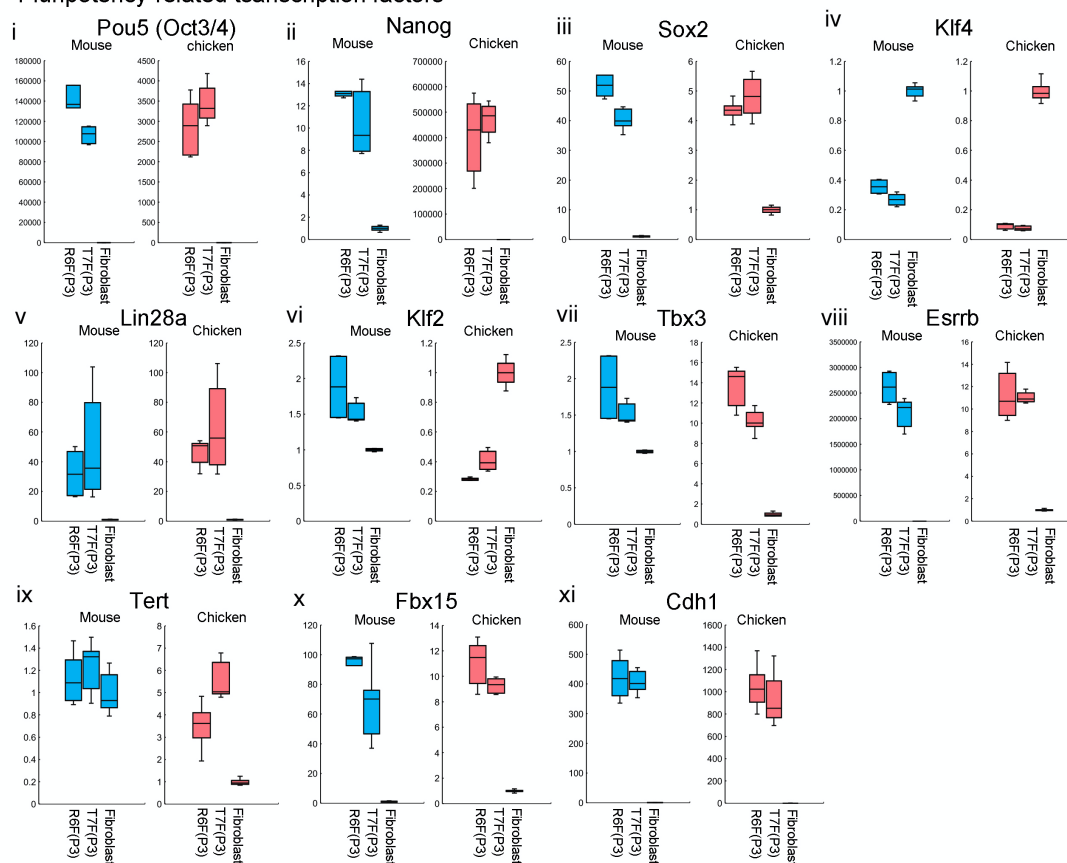

**b** LIF- and FGF-related genes

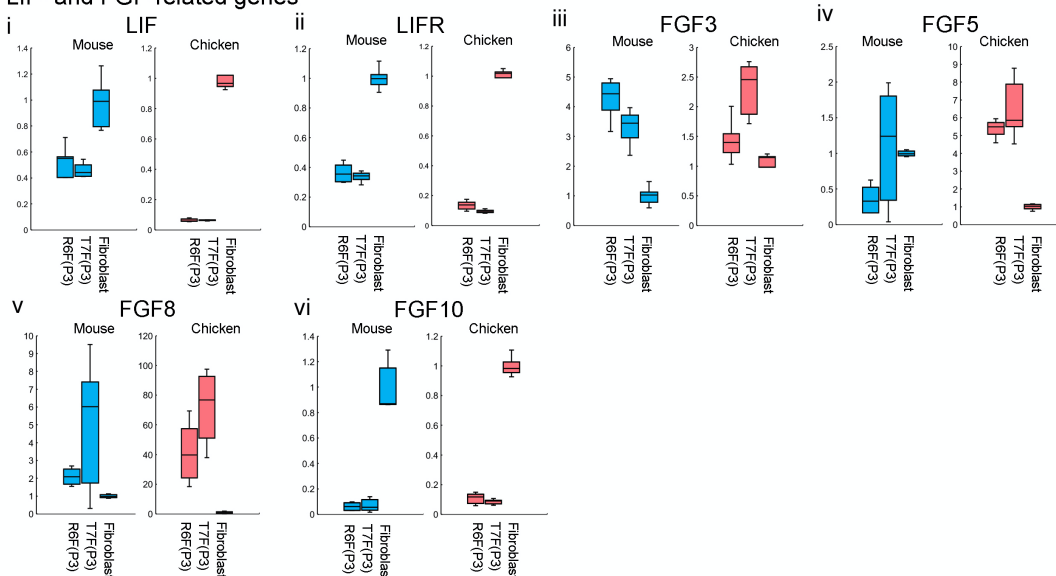

**Supplementary Figure 4. Comparison of pluripotency-related gene expression in mouse and chicken iPSCs with PB-R6F, iPSCs with PB-TAD-7F, and fibroblasts.**

a: Endogenous expression of pluripotency marker genes in mouse and chicken-derived cells. The mRNA expression of *Pou5 (Oct3/4)* (i), *Nanog* (ii), *Sox2* (iii), *Klf4* (iv), *Lin28a* (v), *Klf2* (vi), *Tbx3* (vii), *Esrrb* (viii), *Tert* (ix), *Fbx15* (x), *Cdh1* (xi) shows.

b: Endogenous expression of *LIF*- and *FGF*-related genes in mouse and chicken-derived cells. The mRNA

expression of *LIF* (i), *LIFR* (ii), *FGF3* (iii), *FGF5* (iv), *FGF8* (v), and *FGF10* (vi) shows.

Gene expression was quantified relative to *GAPDH* (internal control), and showed that the fibroblast expression level was 1.0. Blue bars denote mouse-derived cells and red bars denote chicken-derived cells. Bars represent iPSCs with PB-R6F (passage number 3; P3), iPSCs with PB-TAD-7F (passage number 3; P3), and fibroblasts. Centerlines of box plots indicate medians; box limits indicate the 25th and 75th percentiles. n=4 (mouse PB-R6F and chicken fibroblast), n=6(other).

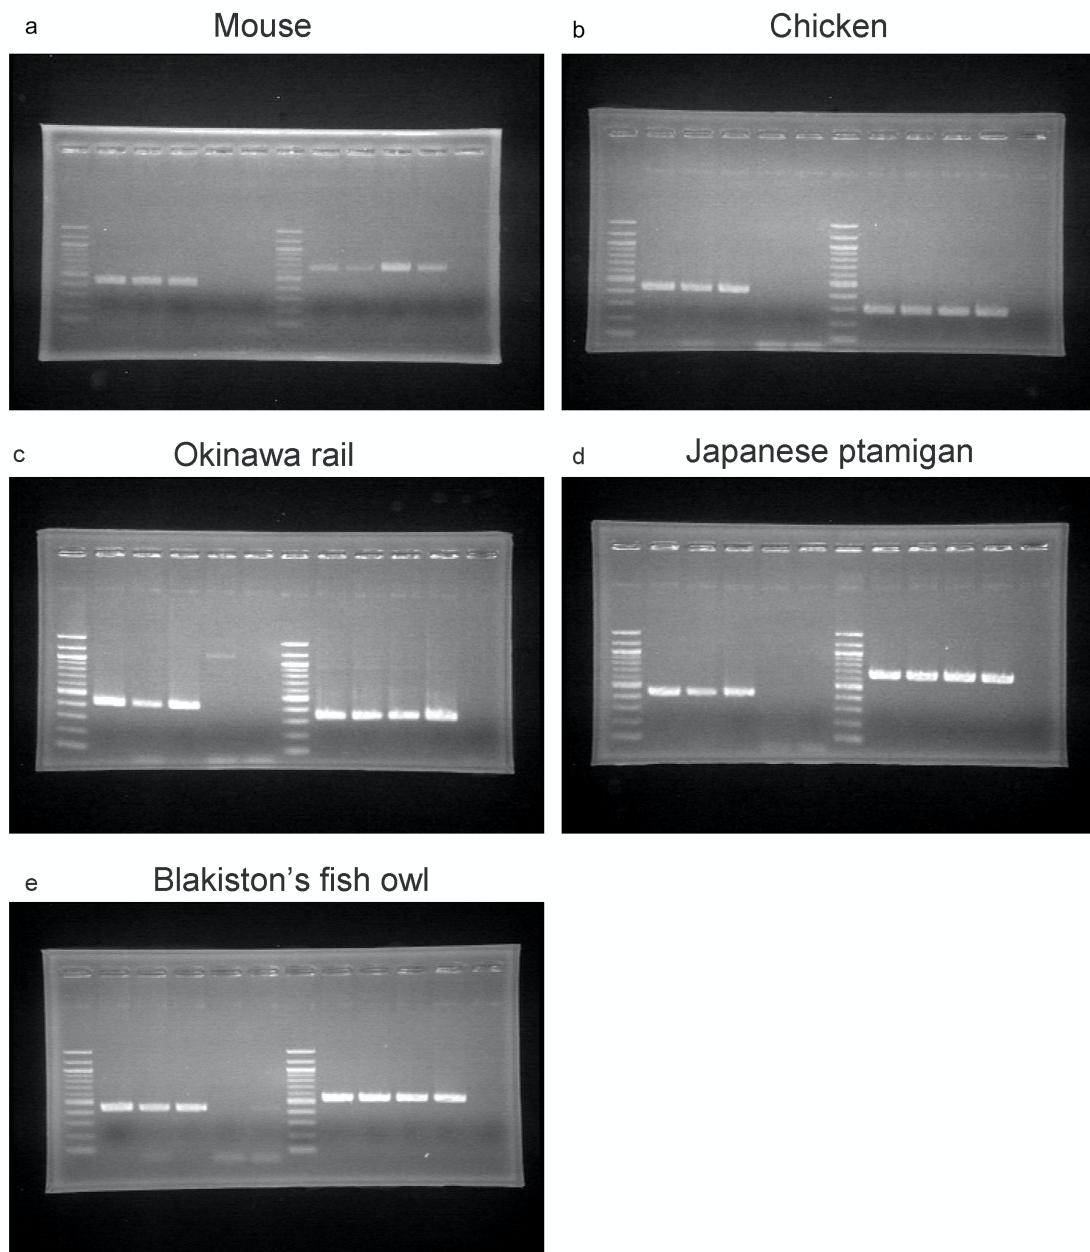

**Supplementary Figure 5. Detection of transduced genes by genomic PCR (full scan blot).**

The gel photographs show mouse (a), chicken (b), Okinawa rail (c), Japanese ptarmigan (d), and Blakiston's fish owl (e). The six lanes on the left of each gel show the PB-TAD-7F reprogramming vector. The six

right lanes of each gel show *Tsc-2* (internal control). Detailed information is shown in Figure 2a (high-magnification image of these gel).

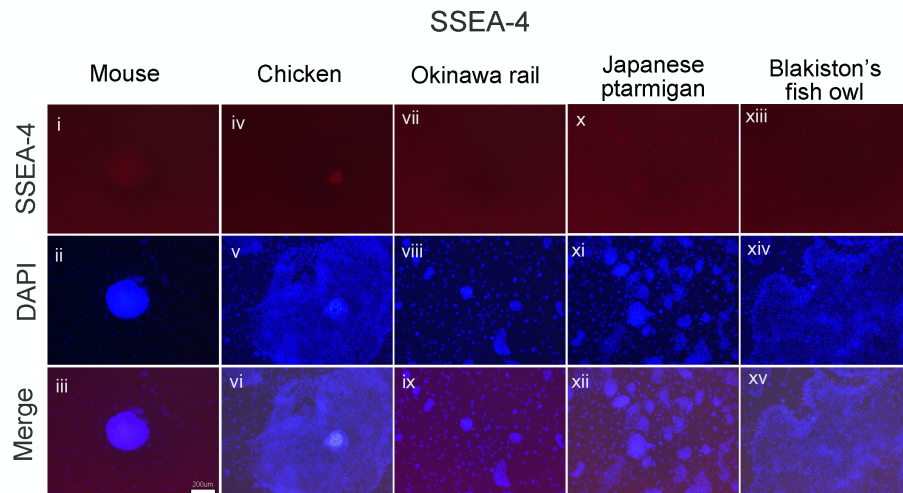

**Supplementary Figure 6. Detection of stage-specific embryonic antigen (SSEA)-4.**

Images are from mouse (i-iii), chicken (iv-vi), Okinawa rail (vii-ix), Japanese ptarmigan (x-xii), and Blakiston's fish owl (xiii-xv). Panels show SSEA-4 (i, iv, vii, x, xiii), DAPI (ii, v, viii, xi, xiv), and the merged (iii, vi, ix, xii, xv) images. The bars represent 200  $\mu$ m.

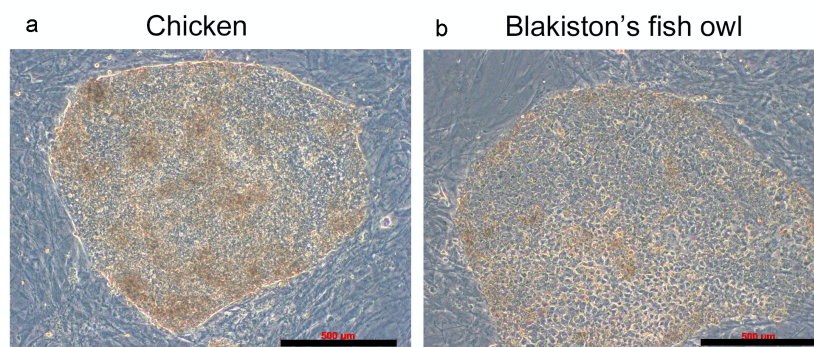

**Supplementary Figure 7. Morphology of iPSCs from chick and Blakiston's fish owl at a late passage.**

The images are a chicken iPSC colony at passage 20 (a) and a Blakiston's fish owl iPSC colony at passage 20 (b). The bars represent 500  $\mu$ m.



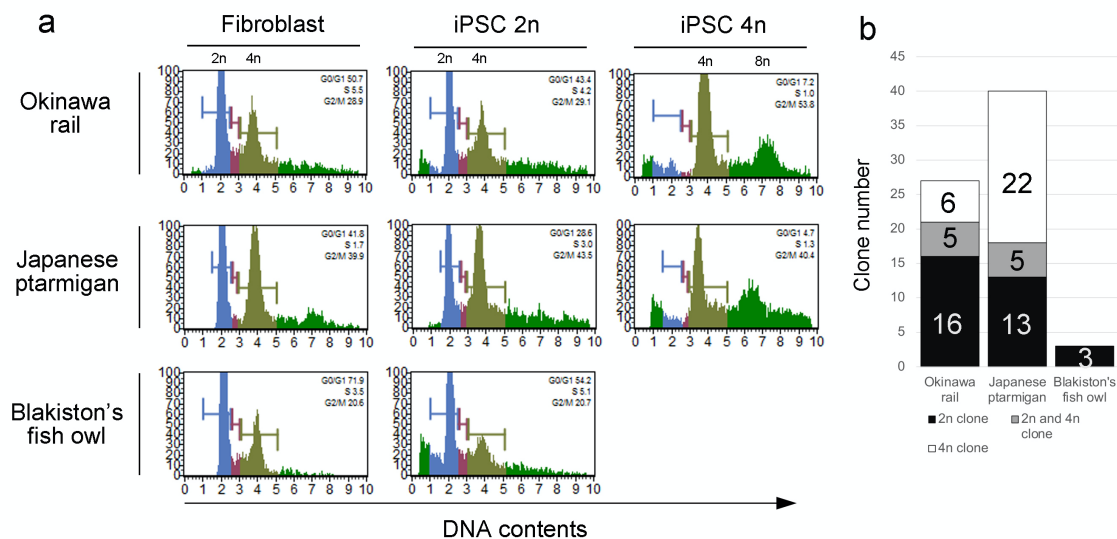

**Supplementary Figure 8 Chromosomal analysis of Okinawa rail, Japanese ptarmigan, and Blakiston's fish owl-derived iPSCs.**

a: DNA content profile analysis of Okinawa rail, Japanese ptarmigan, and Blakiston's fish owl-derived iPSCs by flow cytometry. The DNA content profile was analyzed by flow cytometry to evaluate chromosomal polyploidy and diploidy. Panels represent fibroblasts, diploid iPSCs, and polyploid iPSCs.

b: Number of diploid and polyploid clones derived from Okinawa rail, Japanese ptarmigan, and Blakiston's fish owl-derived iPSCs. The black area shows the number of 2n clones, the gray area shows the number of 2n and 4n clones, and the white area shows the number of 4n clones.

c: Chromosomal patterns of endangered Japanese avian-derived iPSCs. The panels show the chromosome pattern of Okinawa rail-derived iPSCs (i, ii), Japanese ptarmigan-derived iPSCs (iii, iv), and Blakiston fish owl-derived iPSCs (v, vi). Panels show the representative mitotic phase (i, iii, v), and the aligned chromosomes (ii, iv, vi).

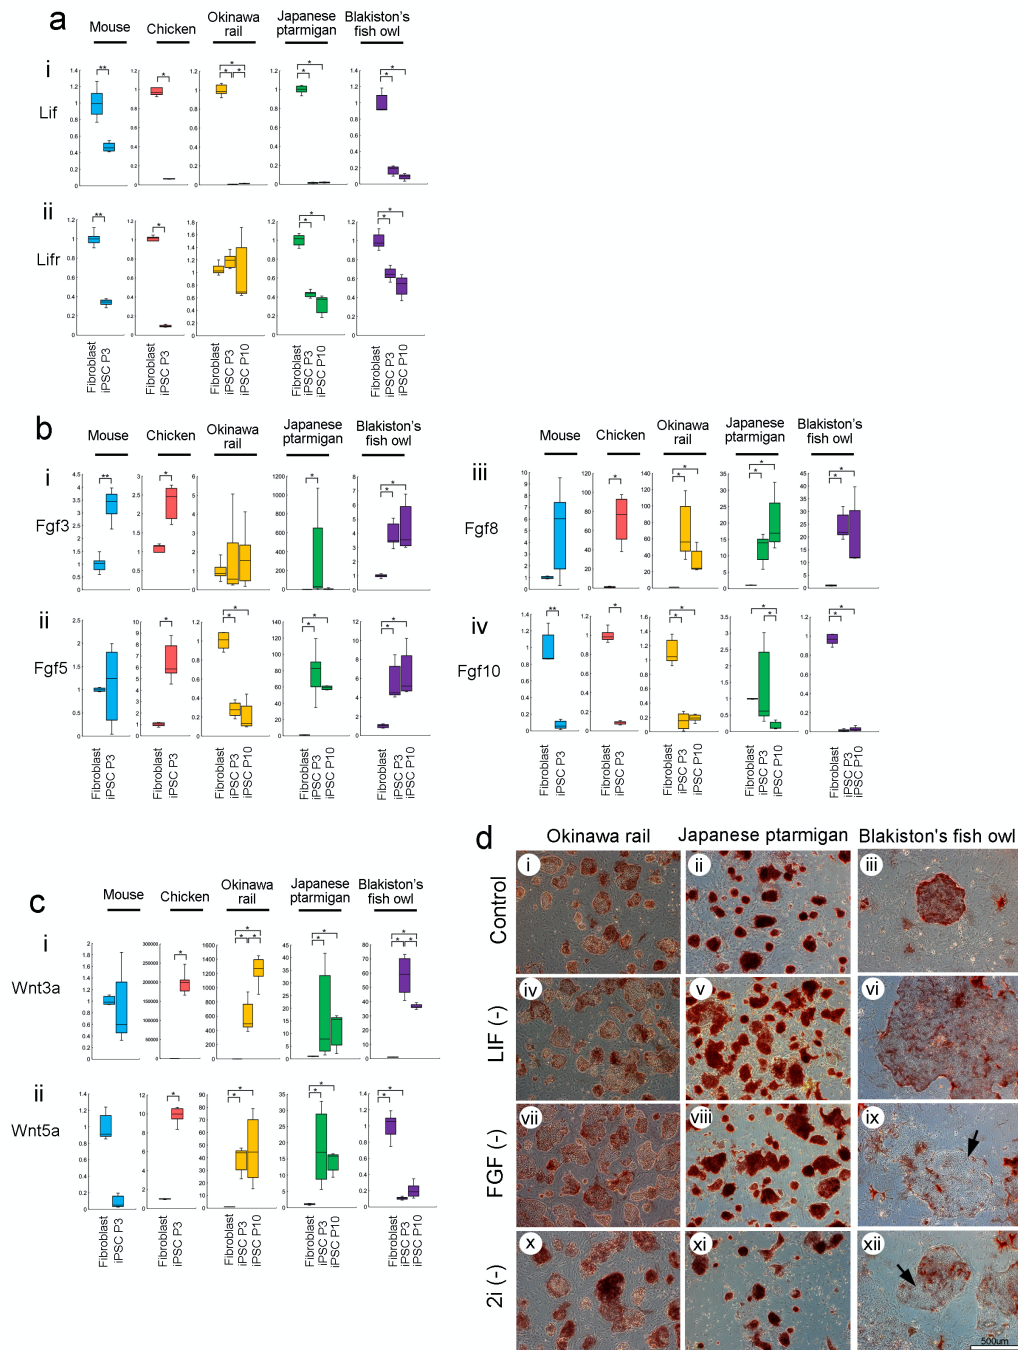

**Supplementary Figure 9** *Lif*, *Lifr*, *Fgf* family, and *Wnt* gene expression and Cell culture conditions of Okinawa rail, Japanese ptarmigan, and Blakiston's fish owl-derived iPSCs.

a: *Lif* (i) and *Lifr* (ii) gene expression in mouse, chicken, Okinawa rail, Japanese ptarmigan, and Blakiston fish owl-derived iPSCs.

b: *Fgf 3* (i), *Fgf 5* (ii), *Fgf 8* (iii), *Fgf 10* (iv) gene expression in mouse, chicken, Okinawa rail, Japanese ptarmigan, and Blakiston fish owl-derived iPSCs.

c: *Wnt 3a* and *Wnt 5a* gene expression in mouse, chicken, Okinawa rail, Japanese ptarmigan, and Blakiston fish owl-derived iPSCs.

Gene expression was quantified relative to that of the *GAPDH* internal control. n=4 (chicken fibroblast), n=6 (other). \* P<0.05, \*\* P<0.01. Blue bars, mouse; red bars, chicken; yellow bars, Okinawa rail; green bars, ptarmigan; and purple bars, Blakiston's fish owl-derived cells. Mouse and chicken: bars represent fibroblasts and iPSCs (passage number 3; P3). Okinawa rail, Japanese ptarmigan, and Blakiston's fish owl: bars represent fibroblasts, iPSCs (P3), and iPSCs (P10). Centerlines of box plots indicate medians; box limits indicate the 25th and 75th percentiles.

d: Alkaline phosphatase staining of Okinawa rail (i, iv, vii, x), Japanese ptarmigan (ii, v, viii, xi), and Blakiston's fish owl iPSCs (iii, vi, ix, xii) in standard medium (i-iii), LIF minus medium (iv-vi), FGF minus medium (vii-ix), and 2i minus medium (x-xii). The panels are Okinawa rail, Japanese ptarmigans, and Blakiston's fish owls iPSCs. The bars represent 500  $\mu$ m.

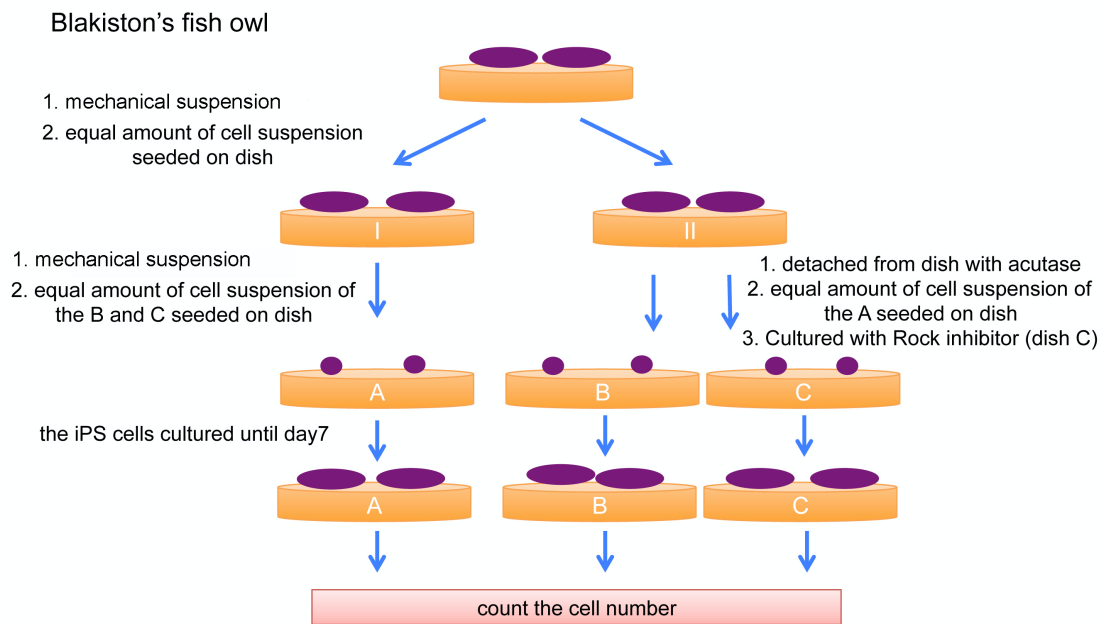

**Supplementary Figure 10. Schematic of cell number counting for Blakiston's fish owl-derived iPSCs.**

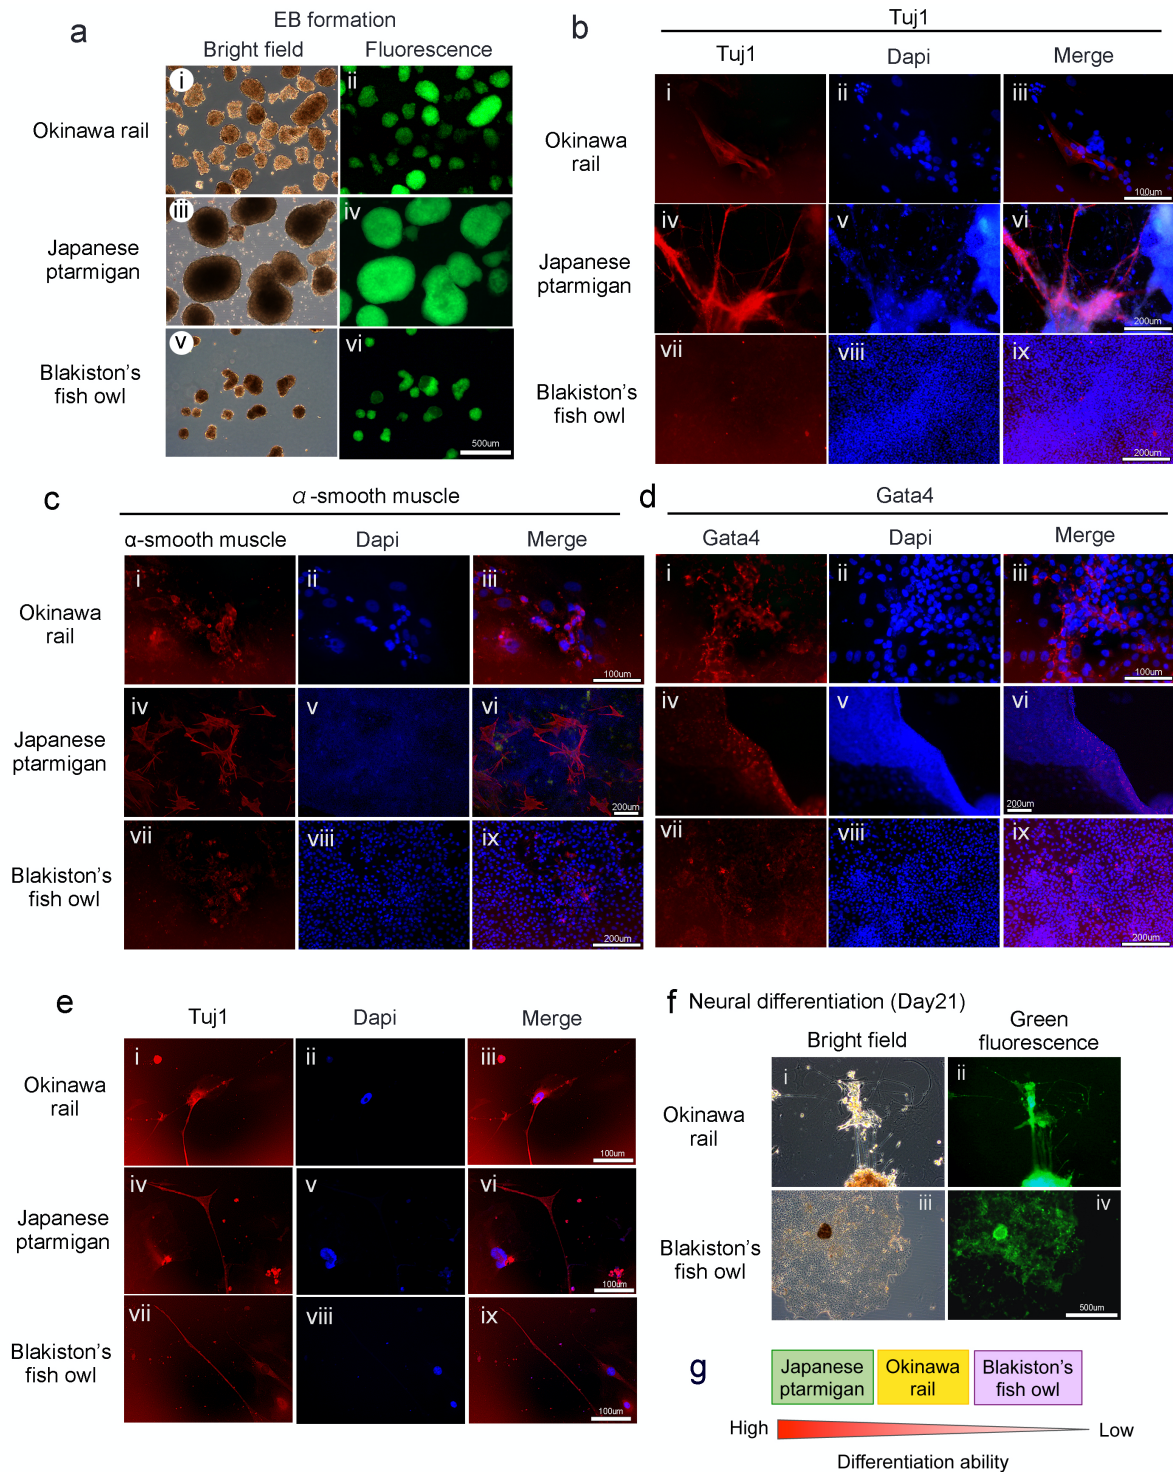

**Supplementary Figure 11. *In vitro* differentiation of Okinawa rail, Japanese ptarmigan, and Blakiston's fish owl-derived iPSCs.**

a: Cytomorphology of embryoid bodies (EBs). Panels show Okinawa rail-derived EBs (i, ii), Japanese ptarmigan-derived EBs (iii, iv), and Blakiston's fish owl-derived EBs (v, vi). The panels represent bright field images (i, iii, v) and GFP (ii, iv, vi). The bars represent 500  $\mu$ m.

b, c, and d: Immunocytochemical evaluation of the ability to differentiate into the three germ layers *in vitro*. Ectodermal cells (Tuj1) (b), mesodermal cells ( $\alpha$ -smooth muscle) (c), and endodermal cells

(Gata4) (d) are shown. Panels show Okinawa rail-derived cells (i-iii), Japanese ptarmigan-derived cells (iv-vi), and Blakiston's fish owl-derived cells (vii-ix). The bars represent 100  $\mu\text{m}$  (Okinawa rail) or 200  $\mu\text{m}$  (Japanese ptarmigan and Blakiston fish owl). Red fluorescence (i, iv,vii), dapi (ii, v, viii) and merge (iii, vi, ix).

e: Cytomorphology of dendrite-like structures derived from Okinawa rail, Japanese ptarmigan, and Blakiston's fish owl-derived iPSCs. Panels show Okinawa rail-derived cells (i-iii), Japanese ptarmigan-derived cells (iv-vi), and Blakiston's fish owl-derived cells (vii-ix). The bars represent 100  $\mu\text{m}$  (Okinawa rail) or 200  $\mu\text{m}$  (Japanese ptarmigan and Blakiston fish owl). Red fluorescence (i, iv,vii), dapi (ii, v, viii) and merge (iii, vi, ix). Bars represent 100  $\mu\text{m}$ .

f: Differences in the *in vitro* differentiation potential of Okinawa rail and Blakiston fish owl-derived iPSCs at day 21. Panels show Okinawa rail (i, ii) and Blakiston's fish owls (iii, iv). Panels show bright field (i, iii) and green fluorescence (ii, iv). The bars represent 500  $\mu\text{m}$ .

g: Differentiation ability of Okinawa rail, Japanese ptarmigan, and Blakiston fish owl-derived iPSCs. Differences in *in vitro* differentiation potential among Okinawa rail, Japanese ptarmigan, and Blakiston fish owl-derived iPSCs. Japanese ptarmigan-derived iPSCs have the highest differentiation ability, followed by Okinawa rail-derived iPSCs and Blakiston's fish owl-derived iPSCs.

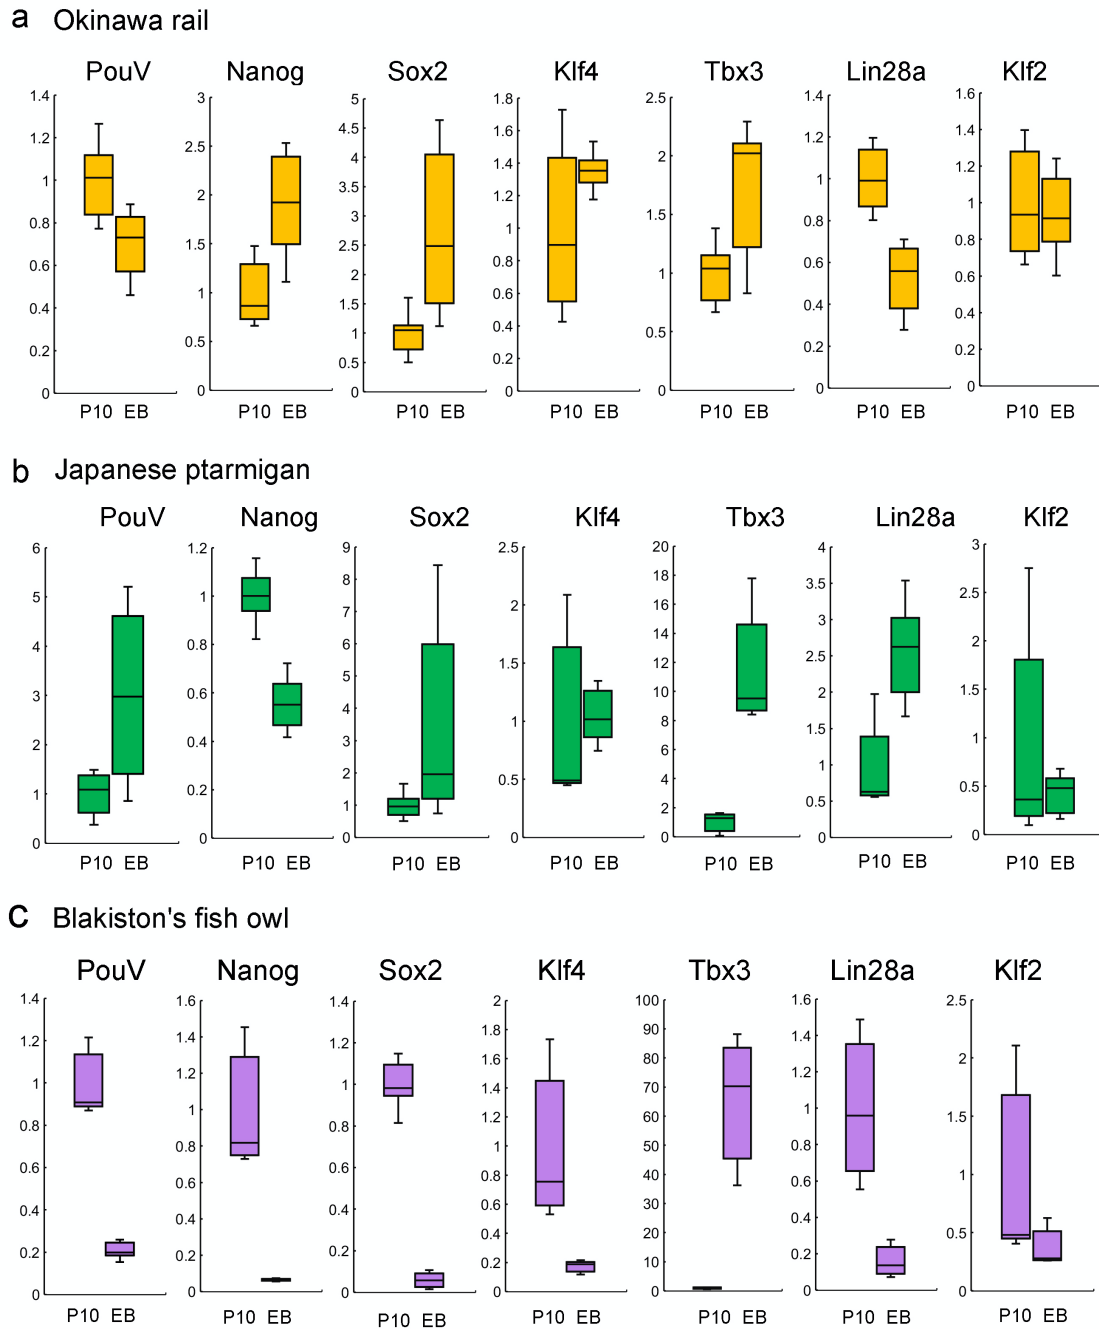

**Supplementary Figure 12. Comparison of pluripotency-related gene expression of Okinawa rail, Japanese ptarmigan, and Blakiston's fish owl-derived cells between iPSCs with PB-TAD-7F and embryoid bodies (EBs).**

a: Endogenous expression of pluripotency marker genes in Okinawa rail-derived iPSCs and EBs.

b: Endogenous expression of pluripotency marker genes in Japanese ptarmigan-derived iPSCs and EBs.

c: Endogenous expression of pluripotency marker genes in Japanese ptarmigan-derived iPSCs and EBs.

Gene expression was quantified relative to *GAPDH* (internal control). The expression level is 1.0 in iPSCs with PB-TAD-7F (passage 10; P10). The bars represents iPSCs with PB-TAD-7F (P10) and EBs. n=6. Centerlines of box plots indicate medians; box limits indicate the 25th and 75th percentiles.

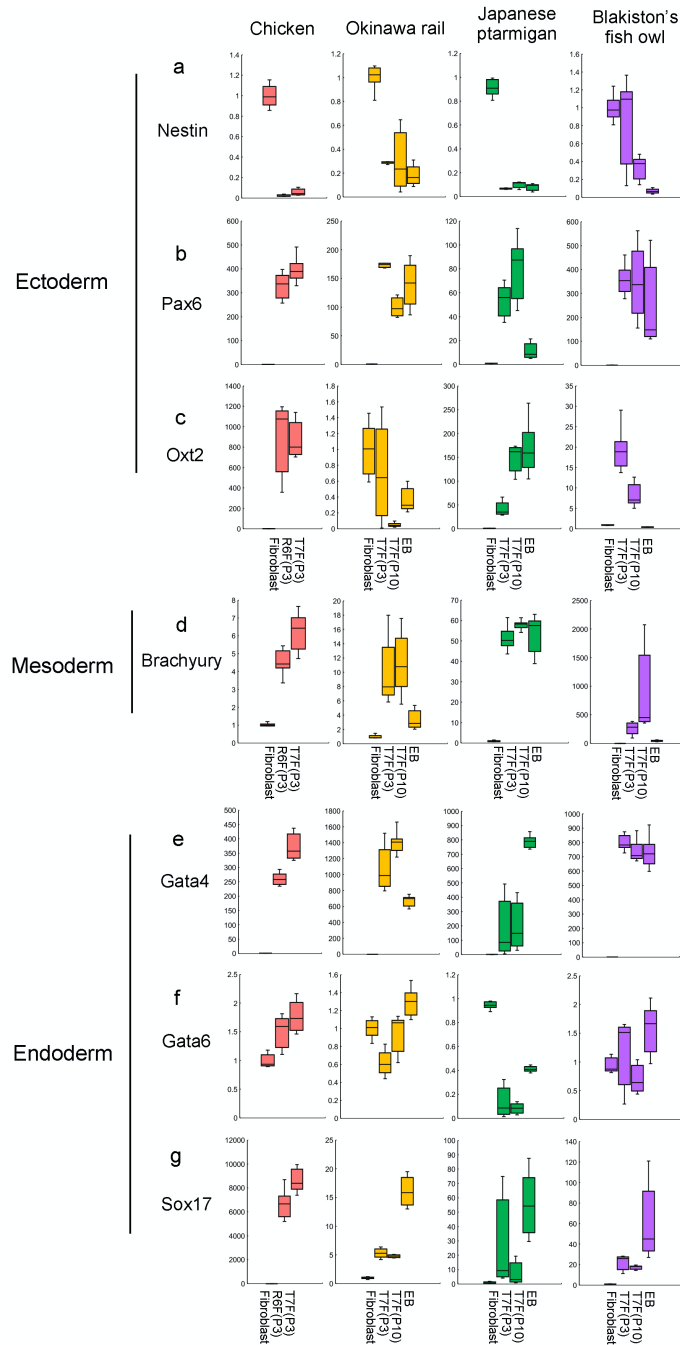

**Supplementary Figure 13. Comparison of the germ layer-related gene expression of chick, Okinawa rail, Japanese ptarmigan, and Blakiston's fish owl-derived cells among fibroblasts, iPSCs (passage 3; P3), iPSCs (passage 10, P10), and embryoid bodies (EBs).**

The mRNA expression of Nestin (a), Pax6 (b), Oxt2 (c), Brachyury (d), Gata4 (e), Gata6 (f), Sox17 (g) shows. Chicken (red), Okinawa rail (yellow), Japanese ptarmigan (green), Blakiston's fish owl (purple). The bars represent fibroblasts, iPSCs (P3), iPSCs (P10), and EBs.  $n=6$ . Centerlines of box plots indicate medians; box limits indicate the 25th and 75th percentiles.

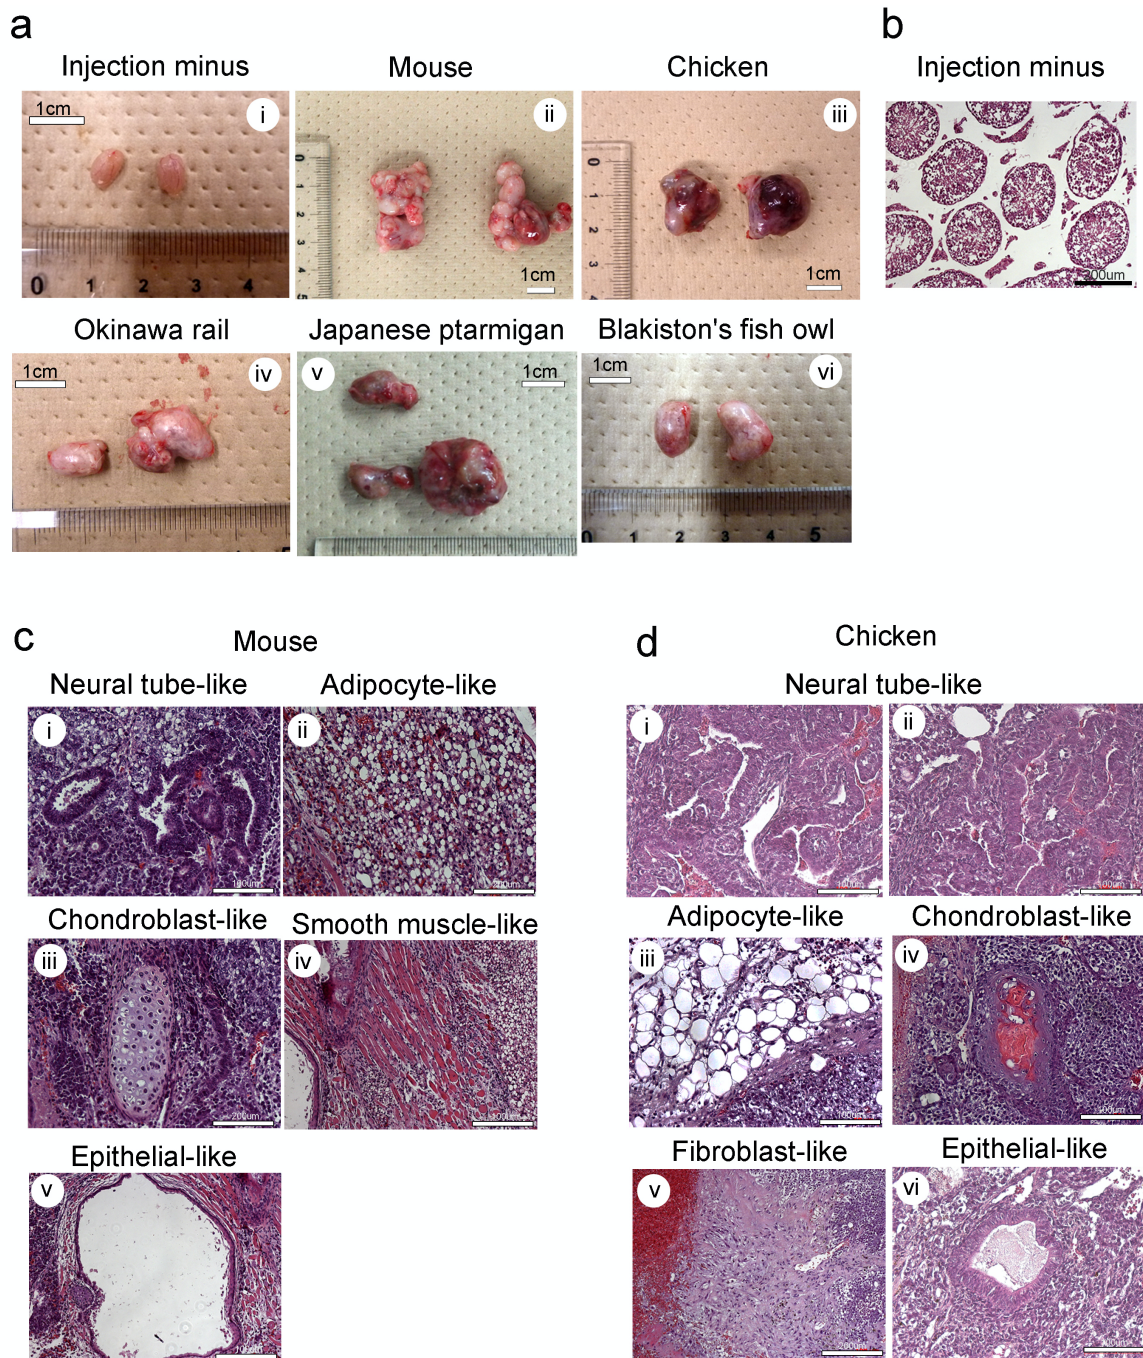

**Supplementary Figure 14. Differentiation of the established mouse, chicken, Okinawa rail, Japanese ptarmigan, and Blakiston's fish owl-derived iPSCs *in vivo*.**

a: Teratoma formation from iPSCs generated with the PB-TAD-7F reprogramming vector.

Injection minus (control) (i), mouse iPSC-derived teratomas (ii); chicken iPSC-derived teratomas (iii); Okinawa rail iPSC-derived teratomas (iv); Japanese ptarmigan iPSC-derived teratomas (v); Blakiston's fish owl iPSC-derived teratomas (vi). Bars show 1cm.

b–d: Histological analysis of injection minus (b), mouse iPSC-derived teratomas (c), and chicken iPSC-derived teratomas (d). Various tissues originating from the three germ layers were identified, and include neural tube-like structures (ectoderm) (ci, di, dii), adipocyte-like (cii, diii), fibroblast-like (dv), chondroblast-



like (ciii, div), and smooth muscle-like structures (civ) (mesoderm), and an epithelial-like structure (cv, dvi) (endoderm). The tissues were stained with hematoxylin and eosin. Bars represent 100–200  $\mu\text{m}$ .

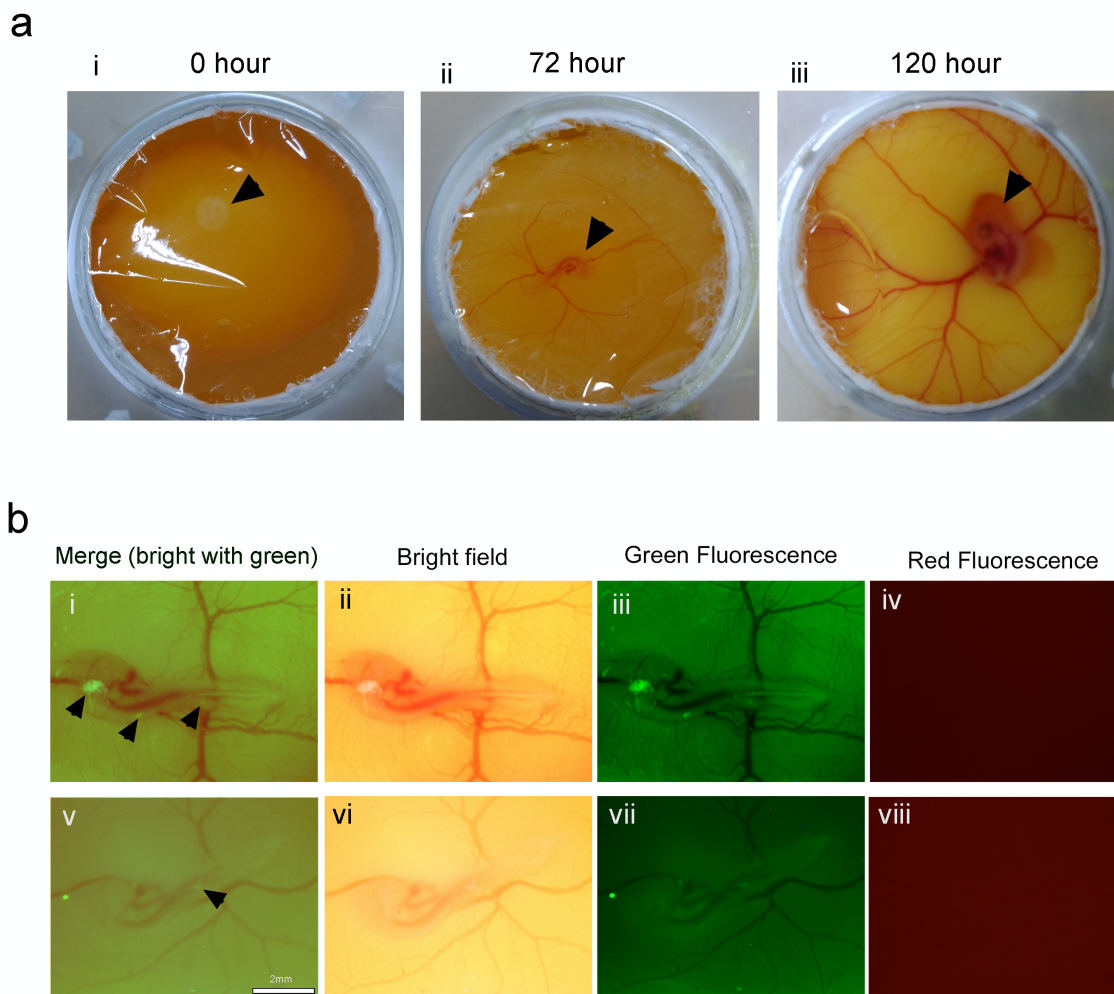

**Supplementary Figure 15. Formation of the chimeric embryo after injection of Japanese ptarmigan-derived iPSCs into the chicken blastoderm.**

a: The developmental process of Japanese ptarmigan-derived iPSCs injected into chicken embryos. The panels show the time after injection: 0 h (i), 72 h (ii), and 120 h (iii).

b: Embryos exhibited iPSC contribution after injection. The arrow indicates green signal. Panels represent bright field and green fluorescence image (i, v), bright field (ii, vi), green fluorescence (iii, vii), and red fluorescence (iv, viii). Bars represent 2 mm.

a PB-TAD-7F

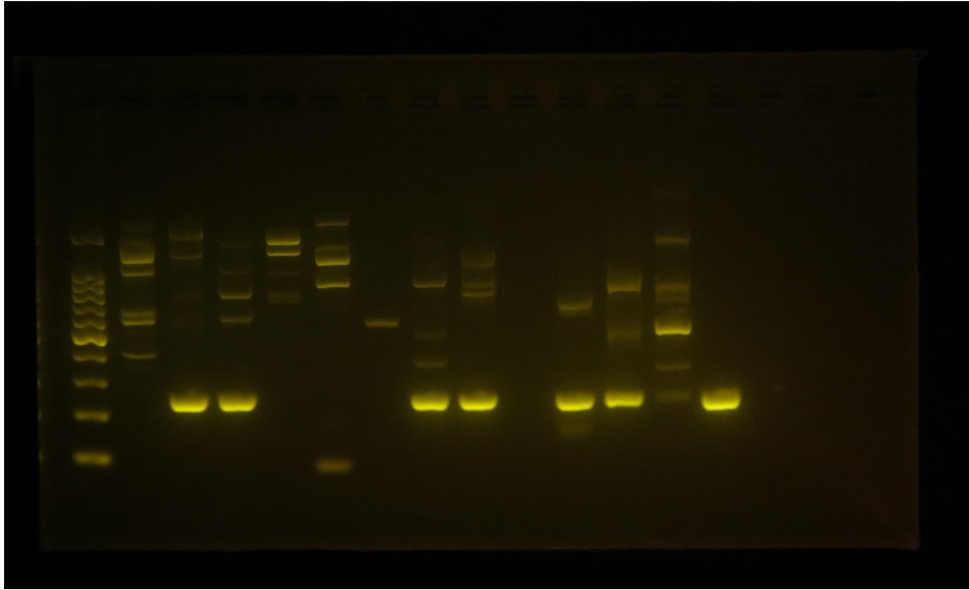

b Tsc-2 (internal control)

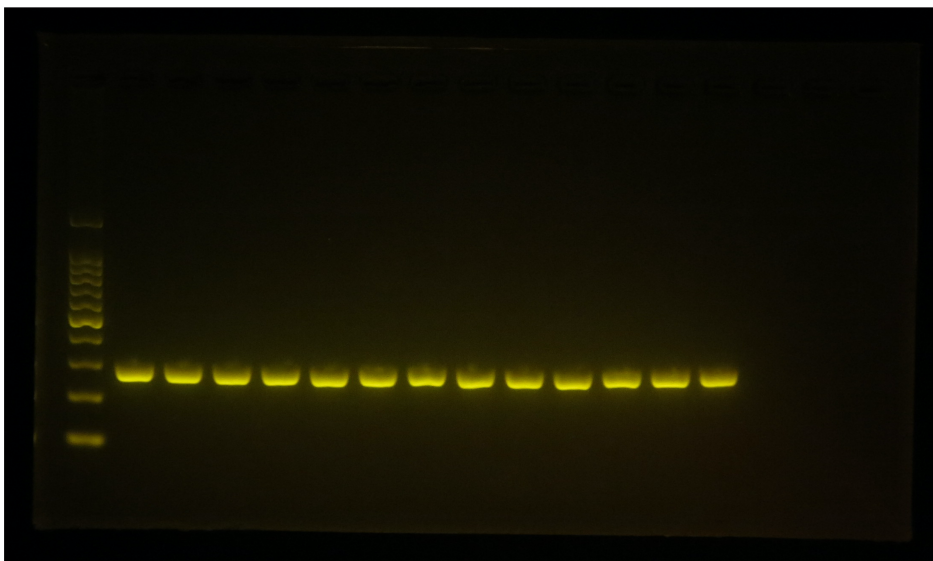

**Supplementary Figure 16 Detection of transduced genes by genomic PCR (full scan blot).**

a: Reprogramming vector for PB-TAD-7F; b: Tsc-2 gene (internal control). Detailed information can be found in Figure 8f (a high-magnification image of this gel).

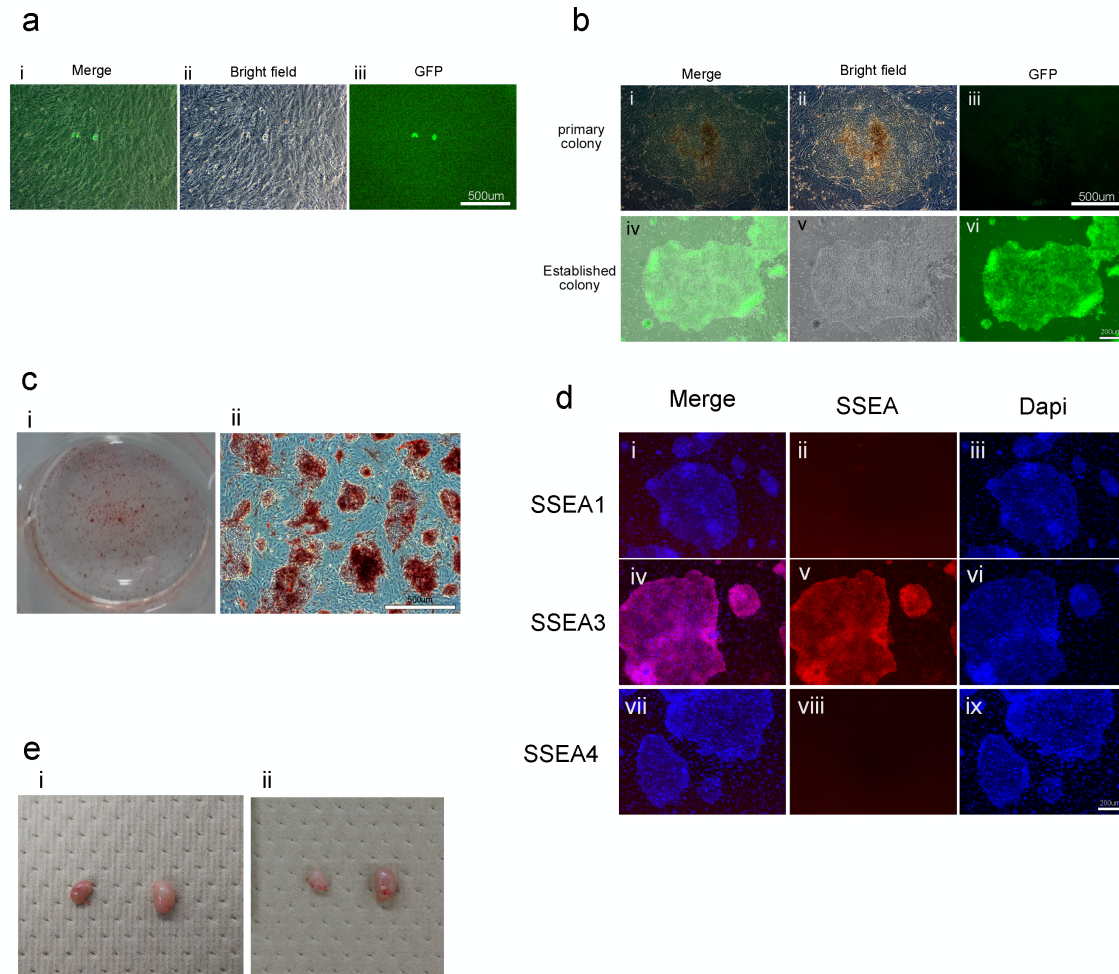

**Supplementary Figure 17 Establishment of Japanese golden eagle reprogrammed cells with PB-TAD-7F reprogramming vector.**

a: Transduction of the reprogramming vector into Japanese golden eagle cells after 72 h. The panels show a merged image (i), a bright field image (ii), and a GFP image (iii). The bar indicates 500  $\mu\text{m}$ .

b: Morphological features of Japanese golden eagle-derived primary and established iPSC colonies using PB-TAD-7F. The panels show a primary colony of reprogrammed cells using PB-TAD-7F (i-iii) and iPSC colonies established using PB-TAD-7F (iv-vi). Panels show merge images (i, iv), bright field images (ii, v), and GFP images (iii, vi). The bars indicate 500  $\mu\text{m}$  (primary colony) and 200  $\mu\text{m}$  (established colony).

c: Alkaline phosphatase staining of Japanese golden eagle iPSCs established using PB-TAD-7F (i, ii). The bar indicates 500  $\mu\text{m}$ .

d: Pluripotency marker staining. The panels show SSEA-1 (i-iii), SSEA-3 (iv-vi), and SSEA-4 (vii-ix). The panels show merged images (i, iv, vii), red fluorescence (iv, v, vi), and counterstained with DAPI (iii, vi, ix). Bar indicates 200  $\mu\text{m}$ .

e: Macroscopic analysis of tumors formed in the testis tissue of SCID mice derived from Japanese golden eagle iPSCs. The images show the testicular tissues of SCID mice with iPSCs established from PB-TAD-7F (i, ii).

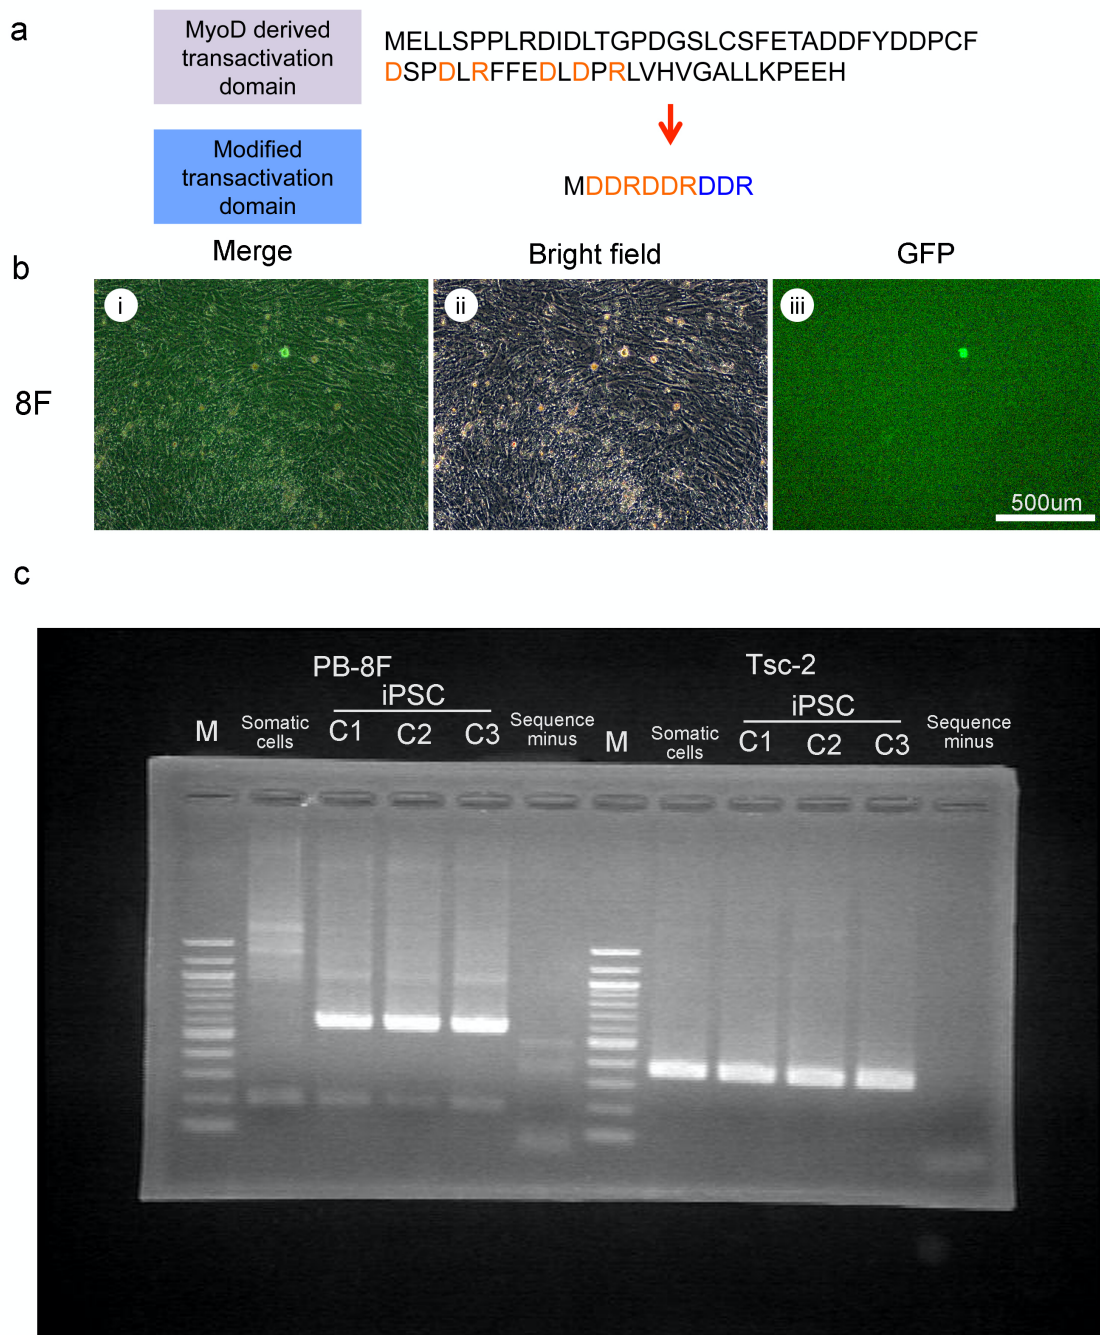

**Supplementary Figure 18. Establishment of Japanese golden eagle iPSCs using PB-DDR-8F reprogramming vector.**

a: Amino acid sequence of the MyoD-derived transactivation domain (the domain used in the PB-TAD-7F vector) and modified transactivation domain (the domain used in the PB-DDR-8F vector).

b: Transduction of the reprogramming vector into Japanese golden eagle cells after 72 h. Panels show transduction of the PB-DDR-8F reprogramming vector. The panel shows the merged image (i), a bright fields image (ii), and GFP image (iii). The bar indicates 500 µm.

c: Detection of the reprogramming cassettes of PB-DDR-8F by genomic PCR. The left six lanes show

detection of the PB-DDR-8F vector. The six right lanes show the detection of the *Tsc-2* gene (internal control).

DDR-DDR-DDR-8F

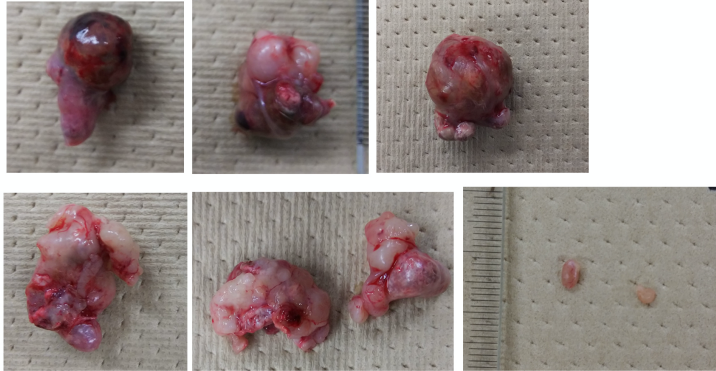

**Supplementary Figure 19. Macroscopic analysis of tumors formed in testis tissue of SCID mice from Japanese golden eagle iPSCs.**

Images show testis tissues of SCID mice with iPSCs established from PB-DDR-8F.

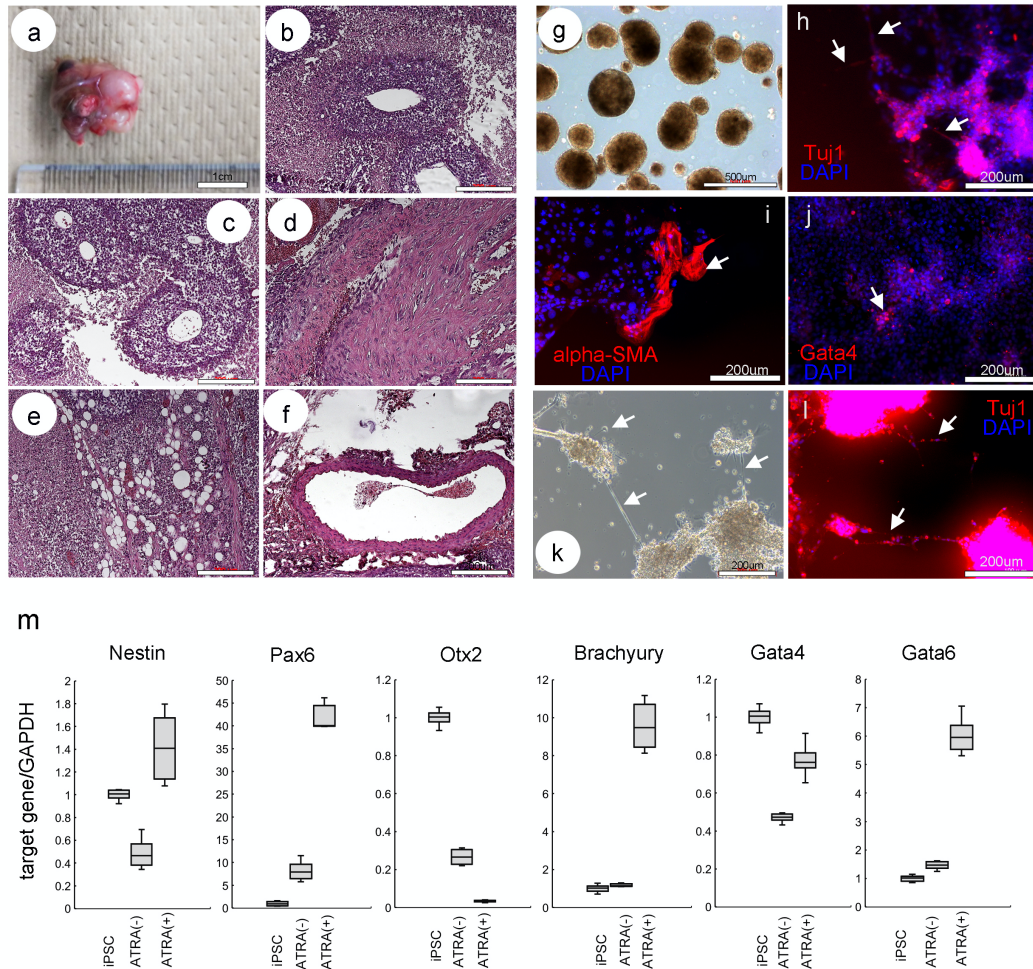

**Supplementary Figure 20. Differentiation ability of established Japanese golden eagle-derived iPSCs.**

a: Representative appearance of tumors in the testes of SCID mice. The bar indicates 1 cm.

b–f: Histological analysis of the tumors formed in the testis tissue of SCID mice. Shown are neural tube-like structures (b and c; ectoderm), fibroblast-like tissue (d, mesoderm), adipocyte-like tissue (e, mesoderm), and epithelial-cell-like tissue (f, endoderm). Bars indicate 200  $\mu$ m.

g–l: Immunocytochemical evaluation of the in vitro ability to differentiate into the three germ layers. Shown are ectodermal markers (Tuj1 and g), mesoderm markers (alpha-SMA, h), and endoderm marker (Gata4; i). Bars indicate 200  $\mu$ m. (j) Cytomorphology of the Japanese golden eagle iPSC-derived EBs. Bars indicate 500  $\mu$ m. (k l) In vitro differentiation of Japanese golden eagle iPSCs in ATRA+ medium. (k) Cytomorphology of neuron-like cells. (l) Immunological staining for the neuron-like cell marker (Tuj1). Bars indicate 200  $\mu$ m.

m: Relative mRNA expression of three germ layer differentiation-related genes evaluated by quantitative RT-PCR in differentiated cells. Bars show gene expression in the Japanese golden eagle iPSCs, differentiated cells in ATRA medium, and differentiated cells in ATRA+ medium. \*:  $P < 0.05$ . Gene expression was quantified relative to that of the *GAPDH* internal control. n=6.

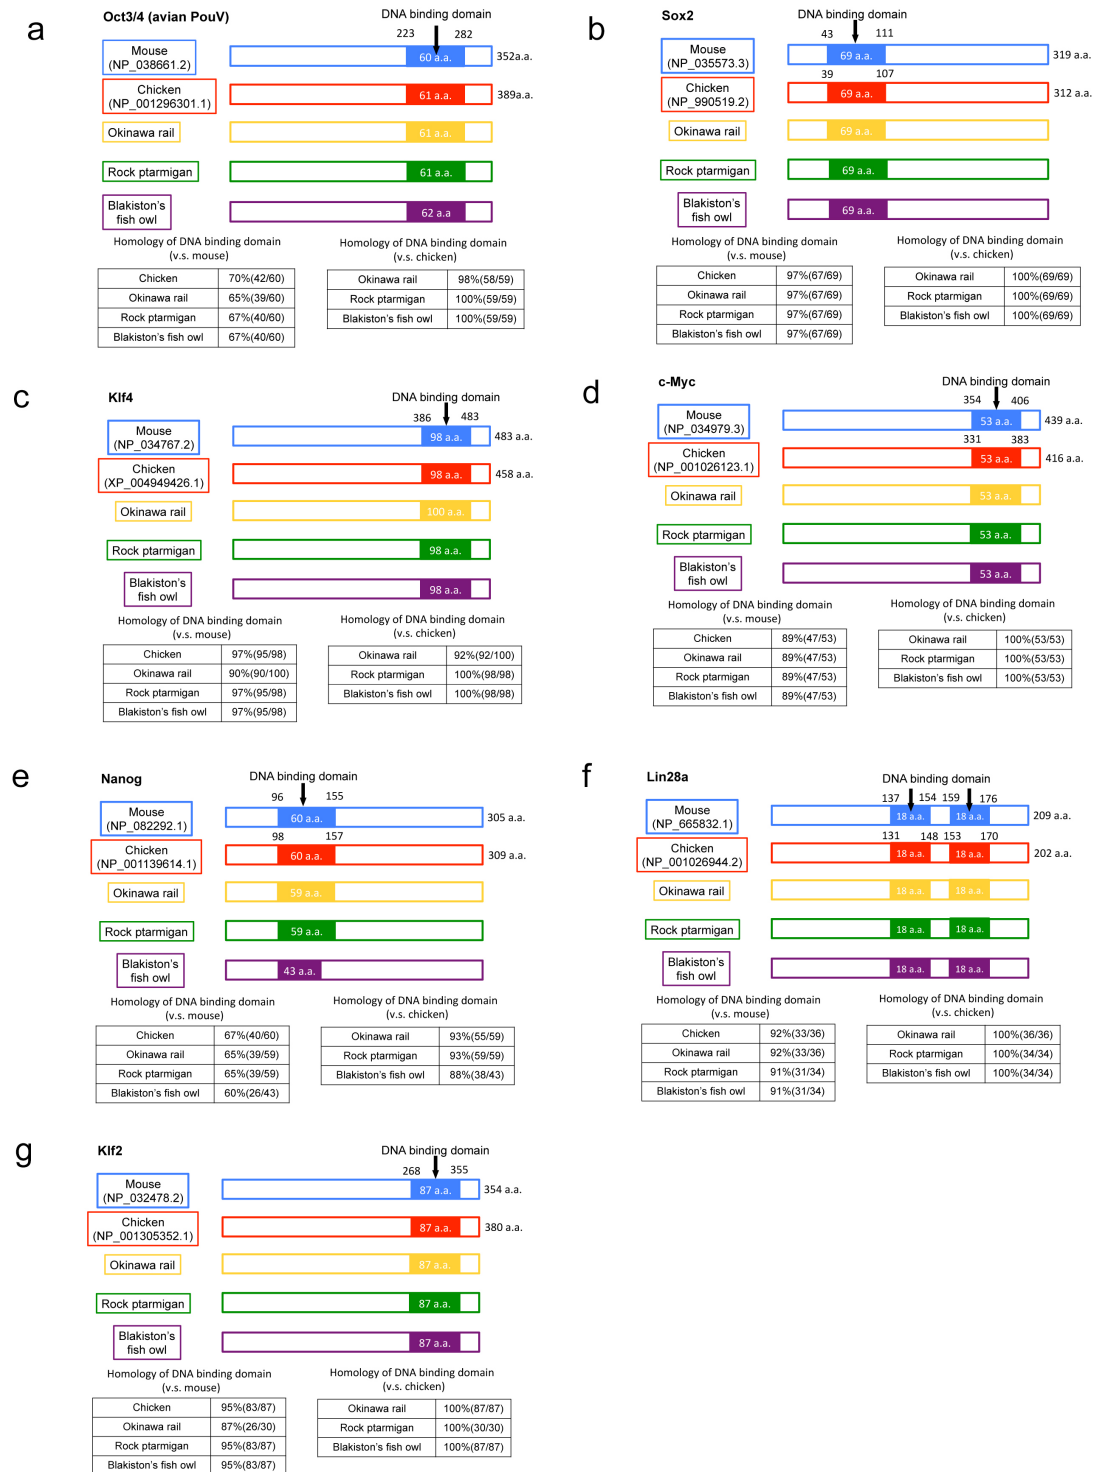

**Supplementary Figure 21. Comparison of amino acid homologies of the DNA binding domains of the seven reprogramming factors.**

a: Oct3/4 (avian POU5), b: Sox2, c: Klf4, d: c-Myc, e: Nanog, f: Lin28a, g: Klf2

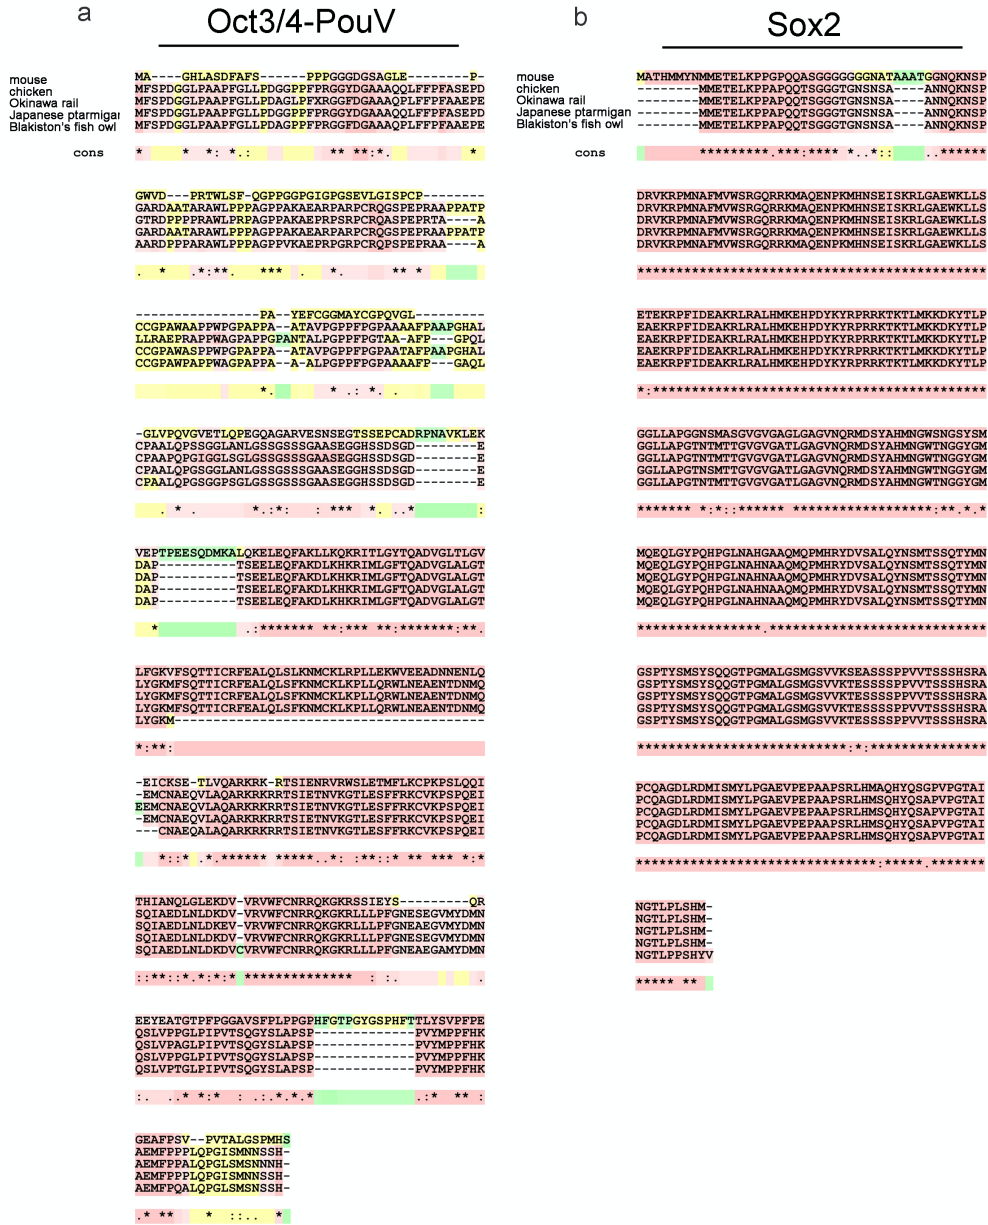

**Supplementary Figure 22. Comparison of amino acid homologies for Oct3/4 (Avian: Pou5) and Sox2 among mouse, chicken, Okinawa rail, Japanese ptarmigan, and Blakiston’s fish owl.**  
 Comparison of amino acid homologies for Oct3/4 (a) and Sox2 (b).



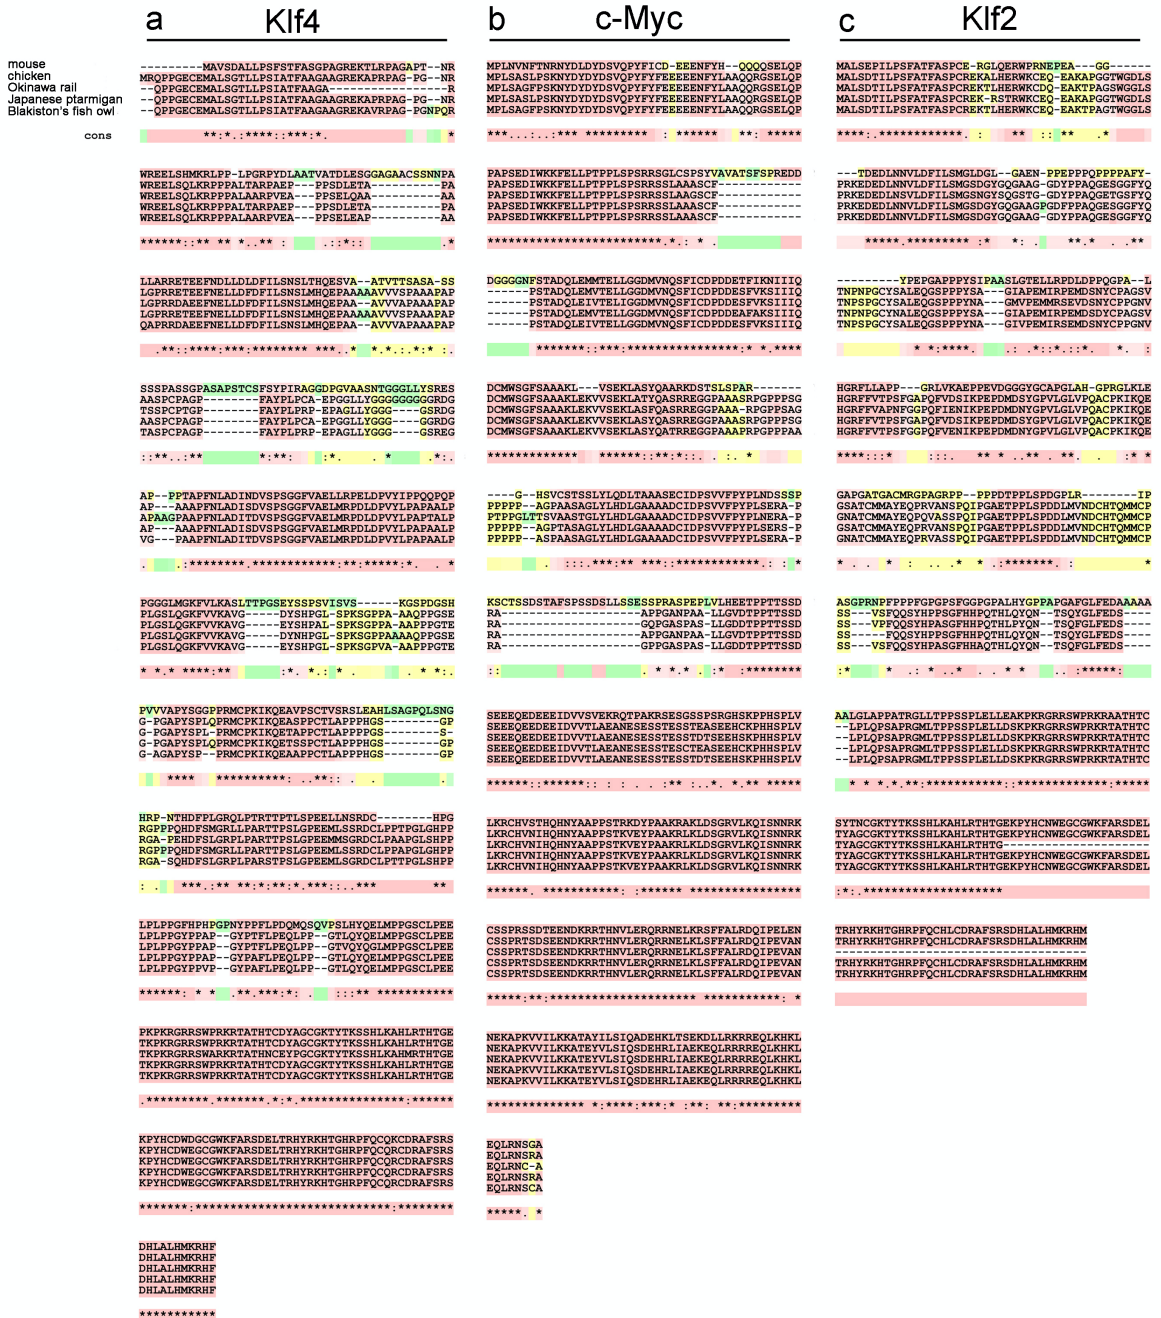

Supplementary Figure 23. Comparison of amino acid homologies for Klf4, c-Myc, and Klf2 among mouse, chicken, Okinawa rail, Japanese ptarmigan, and Blakiston's fish owl.

Comparison of the amino acid homology of Klf4 (a), c-Myc (b), and Klf2 (c).

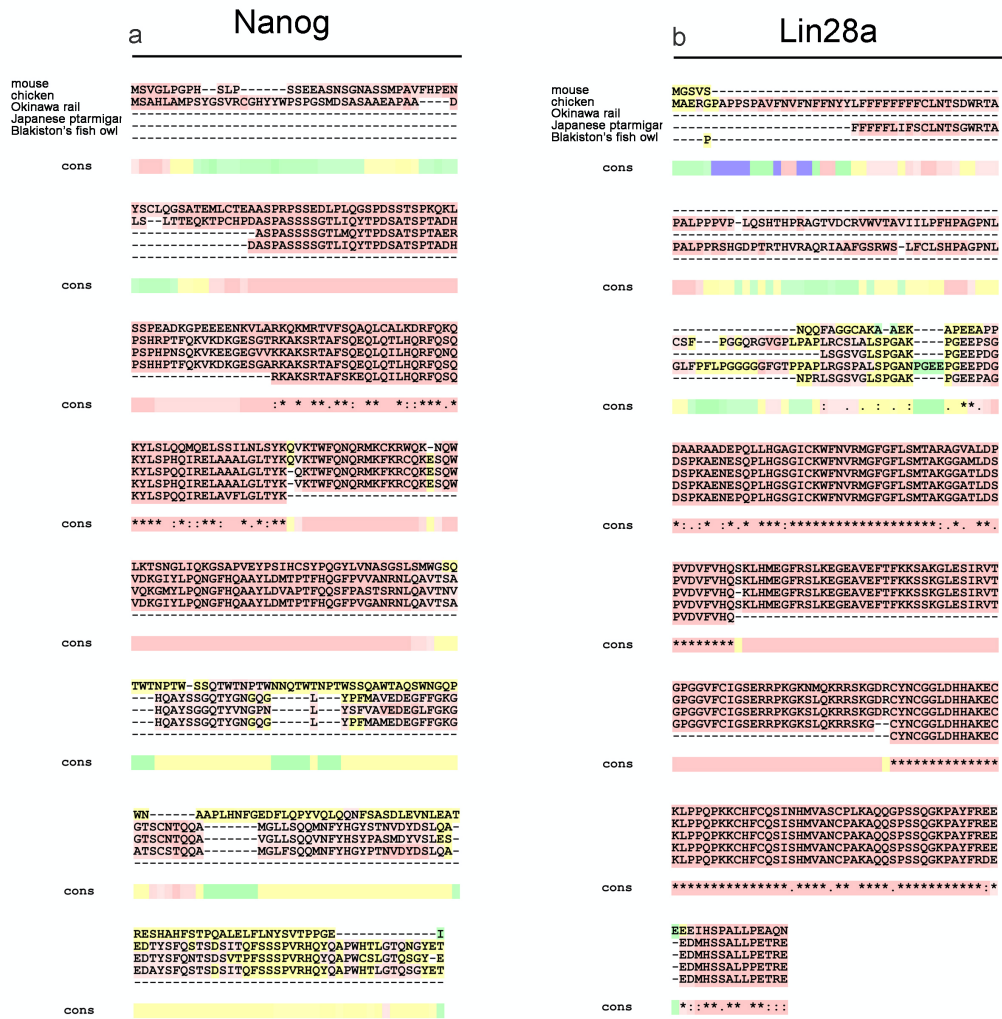

Supplementary Figure 24. Comparison of amino acid homologies for Nanog and Lin28a among mouse, chicken, Okinawa rail, Japanese ptarmigan, and Blakiston's fish owl.

Comparison of amino acid homologies of Nanog (a), and Lin28a (b).

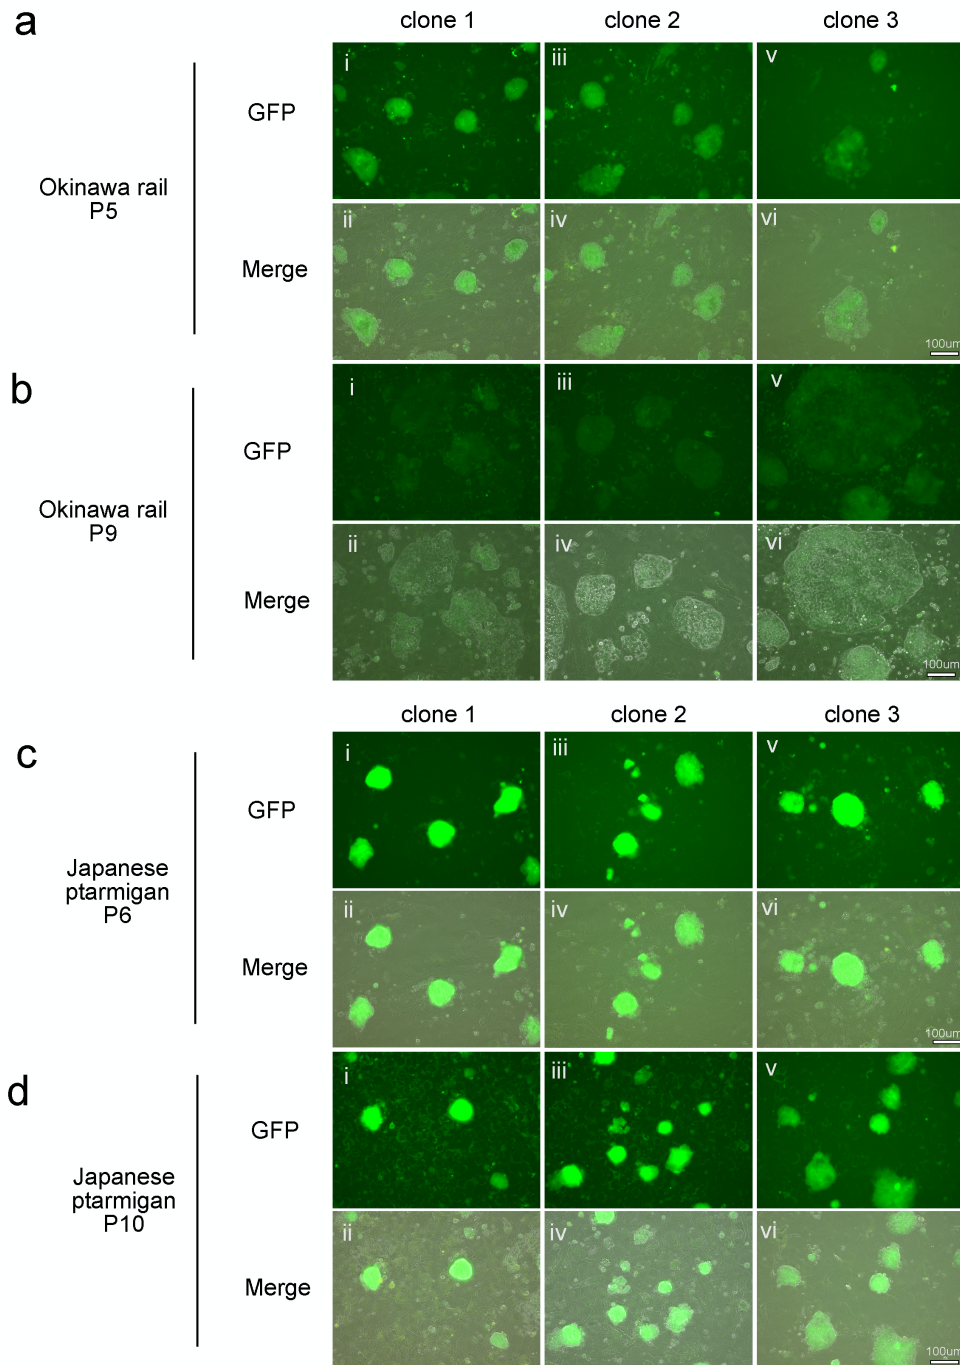

**Supplementary Figure 25 Exogenous gene expression of Okinawa rail and Japanese ptarmigan.**

a: Okinawa rail iPSCs passage 5 day7 after the previous reseeded. b: Okinawa rail iPSCs passage 9 day4 after the previous reseeded. c: Japanese ptarmigan iPSCs passage 6 day7 after the previous reseeded. d: Japanese ptarmigan iPSCs passage 10 day4 after the previous reseeded. Panels show clone 1 (i, ii), clone 2 (iii, iv), and clone 3 (v, vi). The images are GFP (i, iii, v), and merge image (ii, iv, vi). Bars show 100 µm.

Supplementary Table 1 Karyotype analysis of Okinawa rail, Japanese ptarmigan, and Blakiston's fish owl.

| Species              | Clone No. | Chromosome number |    |    |    |    |    |    |    |    |    |    |    |    |    |    |    |    |    |    | total |    |    |
|----------------------|-----------|-------------------|----|----|----|----|----|----|----|----|----|----|----|----|----|----|----|----|----|----|-------|----|----|
|                      |           | 70                | 71 | 72 | 73 | 74 | 75 | 76 | 77 | 78 | 79 | 80 | 81 | 82 | 83 | 84 | 85 | 86 | 87 | 88 |       | 89 | 90 |
| Okinawa rail         | 1         |                   |    |    |    |    |    | 1  | 5  | 9  | 13 | 10 | 5  | 3  | 3  | 1  |    |    |    |    |       |    | 50 |
|                      | 2         | 1                 | 2  | 2  | 3  | 6  | 6  | 8  | 7  | 8  | 4  | 1  |    | 2  |    |    |    |    |    |    |       |    | 50 |
| Japanese ptarmigan   | 1         |                   |    |    |    |    |    |    |    |    |    |    | 5  | 10 | 6  | 9  | 6  | 5  | 1  | 6  | 2     |    | 50 |
|                      | 2         |                   |    |    |    |    |    |    |    |    |    | 5  | 5  | 8  | 5  | 3  | 4  | 6  | 4  | 10 |       |    | 50 |
| Blakiston's fish owl | 1         |                   |    |    |    |    |    | 2  | 9  | 17 | 14 | 5  | 2  | 1  |    |    |    |    |    |    |       |    | 50 |
|                      | 2         |                   |    |    |    |    |    |    |    |    | 4  | 3  | 2  | 41 |    |    |    |    |    |    |       |    | 50 |

Supplementary Table 2 Antibody information

| name                                  | Company                               | Isotype     | Cat No.        | Dilution      |
|---------------------------------------|---------------------------------------|-------------|----------------|---------------|
| SSEA-1                                | STEMGENT, Cambridge, MA, US           | Mouse IgM   | 09-0005        | 1:200         |
| SSEA-3                                | Bioss, Boston, MA, US                 | Rabbit IgG  | bs-3575R       | 1:200         |
| SSEA-4                                | STEMGENT, Cambridge, MA, US           | Mouse IgG3  | 09-0006        | 1:200         |
| anti-betaIII tubulin (TuJ-1)          | R&D systems, Minneapolis, MN, US      | Mouse IgG2A | 55461211       | 1:200         |
| Anti-alpha-Smooth Muscle Actin        | Novus, Centennial, CO, US             | Mouse IgG2A | NB120-18147    | 1:100 - 1:200 |
| Anti-GATA4                            | LifeSpanBiosciences, seattle, WA, US  | Rabbit IgG  | LS-C352237-100 | 1:100 - 1:200 |
| Anti-GFP                              | MBL, Nagoya, JAPAN                    | Rabbit IgG  | 598            | 1:100 - 1:200 |
| anti-HPT 2                            | Biorbyt, cambridge, UK                | Mouse IgG   | ORB383723      | 1:200         |
| anti-vimentin                         | Thermo fisher Scientific, Waltham, MA | Mouse IgG   | MA5-11883      | 1:200         |
| Goat anti-Mouse IgG, Alexa Fluor 488  | Thermo fisher Scientific              |             | A11001         | 1:200         |
| Goat anti-Mouse IgM Alexa Fluor 568   | Thermo fisher Scientific              |             | A21043         | 1:200         |
| Goat anti-Rabbit IgG, Alexa Fluor 568 | Thermo fisher Scientific              |             | A11011         | 1:200         |
| Goat anti-Mouse IgG, Alexa Fluor 568  | Thermo fisher Scientific              |             | A11004         | 1:200         |
| Anti-IgG (H+L chain) (Mouse) pAb-HRP  | MBL                                   |             | 330            | 1:200         |
| Anti-IgG (H+L chain) (Rabbit) pAb-HRP | MBL                                   |             | 458            | 1:200         |

Supplementary Table 3 Primer sequence information for genomic PCR (Figure2a)

| Species              | Gene designation | F/R     | Sequence                  | Product length (bp) |
|----------------------|------------------|---------|---------------------------|---------------------|
| Mouse                | Tsc2             | Forward | TGGCATCTCCAAAACACTGCAT    | 640                 |
|                      |                  | Reverse | TATTCCTGCGACAACCTGACC     |                     |
| Chicken              | Tsc2             | Forward | CCGTTTGCTTGCCCTCTGATGACT  | 294                 |
|                      |                  | Reverse | CAGCTCAGTGTTGTTCTCGGCATT  |                     |
| Okinawa rail         | Tsc2             | Forward | TCCAGCCATCTCAGCCGCTCA     | 345                 |
|                      |                  | Reverse | CTGCTGTTCTGCTCTGAAGGCAT   |                     |
| Japanese ptarmigan   | Tsc2             | Forward | CCTACCTTGTGCTGAGATGCT     | 653                 |
|                      |                  | Reverse | TACAGACCGGCTCCATTGCTT     |                     |
| Blakiston's fish owl | Tsc2             | Forward | ACATCCCCACAGTTACAAAATACGC | 535                 |
|                      |                  | Reverse | GCTCGGGAACCCACCCTT        |                     |
| Reprogramming vector | PB-TAD-7F        | Forward | CTAGCGACACCGAAGAGAACGACA  | 432                 |
|                      |                  | Reverse | CGTTTCTAGGCCACCGTTCCTGT   |                     |

Supplementary Table 4. Primer information for genomic PCR

| Species               | Gene name | F/R     | Sequence                 | Product length (bp) |
|-----------------------|-----------|---------|--------------------------|---------------------|
| Japanese Golden eagle | Tsc2      | Forward | CTCGCTGTTTTGTCCTCAGTGTTG | 363                 |
|                       |           | Reverse | ACTATCCCCACCTTACTATGGTC  |                     |
| Reprogramming vector  | PB-DDR-8F | Forward | ACTGGACCCTAGGTTCCGCAT    | 591                 |
|                       |           | Reverse | TCTAGGGTCCCCAGGTCAACGTTT |                     |

Supplementary Table 5 Primer sequence information for real-time PCR (mouse)

| Species | Gene name   | F/R                      | Sequence                  | Product length (bp) |
|---------|-------------|--------------------------|---------------------------|---------------------|
| Mouse   | Oct3/4      | Forward                  | CCATGCATTCAAAGTGGAGCACA   | 132                 |
|         |             | Reverse                  | ACCCCTGTTGTGCTTTAATCCCT   |                     |
|         | Sox2        | Forward                  | GCACATGGCCCAGCACTACCAG    | 148                 |
|         |             | Reverse                  | TTGCACCCCTCCCAATTCCCT     |                     |
|         | Nanog       | Forward                  | CCCTTACCCACGCCAC          | 132                 |
|         |             | Reverse                  | TCGAGAGTAGCCACCATATCGTT   |                     |
|         | Tbx3        | Forward                  | ATTCTTGTTTTGCCTTTGGGTCT   | 110                 |
|         |             | Reverse                  | AGCCAGCTCTACTTGAAAGCA     |                     |
|         | Klf4        | Forward                  | ATCACCTTGATGCTCTTTGCCT    | 136                 |
|         |             | Reverse                  | ACTTTAGAACACGACTCACCA     |                     |
|         | Klf2        | Forward                  | ACCTGGCCTTGACATGAAGC      | 177                 |
|         |             | Reverse                  | AACTGGTGGCAGAGTCATTTTCCT  |                     |
|         | Lin28a      | Forward                  | GACACTCCCTGGCTCTCCCA      | 113                 |
|         |             | Reverse                  | CCCAGCACCCCAACAAGGTTT     |                     |
|         | Esrrb       | Forward                  | GTATGCTATGCCTCCCAACGA     | 92                  |
|         |             | Reverse                  | TGAGGAACACAAGCTCCCGAT     |                     |
|         | Fbx15       | Forward                  | ATGAGGACAAGAAGCCATC       | 113                 |
|         |             | Reverse                  | TCCTACGCTGTCCATGTACTCG    |                     |
|         | Prdm14      | Forward                  | CCCATGAACCTCCGTGCTCACT    | 100                 |
|         |             | Reverse                  | ACACCTTCCACAGCGTTCACA     |                     |
|         | CDH1        | Forward                  | GCCCTCAATTACCATGTTTGCT    | 138                 |
|         |             | Reverse                  | GCACCCACACAAGATACCTG      |                     |
|         | DDX4 (VASA) | Forward                  | CAGTACCTATGTGCCTCCAG      | 110                 |
|         |             | Reverse                  | CCGCTGTATTCAACGTGTGCTT    |                     |
|         | Dazl        | Forward                  | TGAGGCTCCAAATCAGTGT       | 86                  |
|         |             | Reverse                  | CTTCTGGCAAAACATATCCTTGACT |                     |
|         | TERT        | Forward                  | TCATCATGTAGAGCGAGCCTT     | 105                 |
|         |             | Reverse                  | ACAACTGCCTTACCATAAGTCA    |                     |
|         | LIF         | Forward                  | CTTCTATACAGCCAGCACCA      | 149                 |
|         |             | Reverse                  | TGTGCAGCTTGTTCATACACC     |                     |
|         | LIFR        | Forward                  | GATTGAGCCAAAGAACCCTCC     | 120                 |
|         |             | Reverse                  | CCATACAACGCTGAGAAAGCC     |                     |
|         | FGF3        | Forward                  | ACAGCGCTATAGCATCCTGGAGA   | 119                 |
|         |             | Reverse                  | ATCCGAAGCATAAGCCGCTCT     |                     |
|         | FGF5        | Forward                  | TTCAAGCAGTCCGAGCAACCG     | 146                 |
|         |             | Reverse                  | CATCAAAGCGAAACTTCAGTCT    |                     |
|         | FGF8        | Forward                  | AGCCCACTCCCTGCTCCGA       | 113                 |
|         |             | Reverse                  | CGTCACCAGGCTCTGCTCCCTC    |                     |
|         | FGF10       | Forward                  | ATGTGCGGAGCTACAATCACC     | 96                  |
|         |             | Reverse                  | CCTTGCCGTTCTTCTCAATCGT    |                     |
|         | Wnt3a       | Forward                  | TGGCCCTTTCCAGTCTT         | 148                 |
|         |             | Reverse                  | AGCTTTAAAAGAGTACCAGGCA    |                     |
| Wnt5a   | Forward     | AGTTTTCTCTGGCTTGCTCT     | 149                       |                     |
|         | Reverse     | CCTCCGAGTCTTAGCTTGCTT    |                           |                     |
| Gapdh   | Forward     | CCCAATGTGTCCGTCGT        | 92                        |                     |
|         | Reverse     | CCTCAGATGCCTGCTTCACC     |                           |                     |
| c-myc   | Forward     | CCTCACTCAGCTCCCCTCC      | 105                       |                     |
|         | Reverse     | AGCTTCTTTTACTGCGACTCAGG  |                           |                     |
| Sox3    | Forward     | CCCCAAGAAGTCAATGCCTCCAC  | 142                       |                     |
|         | Reverse     | AAACACACGCACCTGGCTA      |                           |                     |
| Lin28b  | Forward     | AAATTGCGTTAGAAAGAACAAGGA | 117                       |                     |
|         | Reverse     | ACATTGCGTACAAAGCAGTCC    |                           |                     |
| Tfcp2l1 | Forward     | AGATCAAGGTGTTCAAGCCCAA   | 90                        |                     |
|         | Reverse     | TCTCTTCTCTTGAGCCGTTT     |                           |                     |
| Sall4   | Forward     | CTTACCACGAAAGGCAACCTG    | 144                       |                     |
|         | Reverse     | GAAACACCTCGGGCGCTCT      |                           |                     |
| Rex1    | Forward     | CCCACAGCCATCACTCCAGA     | 132                       |                     |
|         | Reverse     | TGGACGAACAGAAGTGTGAGACT  |                           |                     |
| FGF2    | Forward     | AGAAGAGCGACCCACACGTC     | 125                       |                     |
|         | Reverse     | CTTAGAAGCCAGCAGCCGTTCA   |                           |                     |
| Dnmt3b  | Forward     | AGTACCCATCAGTTGACTTGAGC  | 146                       |                     |
|         | Reverse     | ATCTTCCCCACAGAGTCCAC     |                           |                     |

Supplementary Table 6 Primer sequence information for real-time PCR (chicken)

| Species    | Gene name   | F/R                       | Sequence                    | Product length (bp) |
|------------|-------------|---------------------------|-----------------------------|---------------------|
| Chicken    | Pou5        | Forward                   | TCCGCAAAATGTGTGAAGCCAGT     | 114                 |
|            |             | Reverse                   | CTTGCTTTCTGACGCCGGTT        |                     |
|            | Sox2        | Forward                   | GCCCGCTCCGCTTC              | 82                  |
|            |             | Reverse                   | TTTCTAGCTCGGTTTCCATCATGTTGT |                     |
|            | Nanog       | Forward                   | TCTGGGGCTCACCTACAAGCA       | 85                  |
|            |             | Reverse                   | CCACTGACTCTCTTTGGCAAC       |                     |
|            | Tbx3        | Forward                   | CATCGCAGTGACCCGATACCAG      | 146                 |
|            |             | Reverse                   | CGTCGTACACCCGATGGAT         |                     |
|            | Klf4        | Forward                   | CCGGACTACAAAATGCCAAGGAGT    | 89                  |
|            |             | Reverse                   | CGTGAATATCCCCACCTCCGAAC     |                     |
|            | Klf2        | Forward                   | AGCGATACCATCCTGCCCTCCTT     | 88                  |
|            |             | Reverse                   | CCTCTGCTCGACTTCCACCT        |                     |
|            | Lin28a      | Forward                   | CGGTAACAGCCACAACCTCGGAA     | 80                  |
|            |             | Reverse                   | CTTCGCACCTGCAAACTGCT        |                     |
|            | Esrrb       | Forward                   | AGTCTTACTCTGCTGGGCTCT       | 103                 |
|            |             | Reverse                   | TCATCTGGTCCAAGCCCTG         |                     |
|            | Fbx15       | Forward                   | TGTTTTCAGTGCCCGAGTTGCAT     | 127                 |
|            |             | Reverse                   | ACCACACCAACTCAGCACAGAC      |                     |
|            | Prdm14      | Forward                   | AGAGTTTTCAGCTGCATTCTCG      | 75                  |
|            |             | Reverse                   | AGAAATCAACAGAAAGCCACACA     |                     |
|            | CDH1        | Forward                   | CCTGGCAAGCCGTTTACCACA       | 103                 |
|            |             | Reverse                   | ACCTGGCTGTCTTCAGGATCCG      |                     |
|            | DDX4 (VASA) | Forward                   | GACCAACAGCCATCCCTC          | 127                 |
|            |             | Reverse                   | CCTTCATTAGCACCAAGTGAGC      |                     |
|            | Dazl        | Forward                   | TCTGTTAACCTGAAAACCGTCT      | 86                  |
|            |             | Reverse                   | TTCTGAAGTGATGCGCCCTCC       |                     |
|            | TERT        | Forward                   | TGCGCAAAGTACATCTACGTGCCTT   | 95                  |
|            |             | Reverse                   | AATGAACCGGAGCCTTGATGCAAT    |                     |
|            | LIF         | Forward                   | CTCAACCGCTCCACAACACC        | 119                 |
|            |             | Reverse                   | TTGCTGCTCTCCCGTAGCTC        |                     |
|            | LIFR        | Forward                   | ATGGAGCAAAGATTACCCAC        | 144                 |
|            |             | Reverse                   | CAACAAGACAGCTCCATCC         |                     |
|            | FGF3        | Forward                   | CGCAGGAAGCTACTGTGCCACCA     | 132                 |
|            |             | Reverse                   | AGCGAGATCCCGACATCAACAGCA    |                     |
|            | FGF5        | Forward                   | CCCTCCTCCACGCCACCCAA        | 144                 |
|            |             | Reverse                   | CCACGTCCATCCAGCGTACC        |                     |
|            | FGF8        | Forward                   | CTCTCCATCCTCAGCGGTCT        | 100                 |
|            |             | Reverse                   | ATCTGGGCTTCATCAACAGG        |                     |
|            | FGF10       | Forward                   | GTGCGGAGCTACAATCACCT        | 97                  |
|            |             | Reverse                   | TGACCTTGGCTTCTTCTCG         |                     |
|            | Wnt3a       | Forward                   | AACTTTTGGAGGCCAACCCCT       | 93                  |
|            |             | Reverse                   | AAGGTCAACCCGTCATCCCA        |                     |
|            | Wnt5a       | Forward                   | ACCTGCCCATGACTTCTGGTT       | 94                  |
|            |             | Reverse                   | ACCCCTTATTACAGAGCCGAGT      |                     |
|            | Nestin      | Forward                   | ATCACATCCAAGAGCCAAACC       | 147                 |
|            |             | Reverse                   | GCTCTGCACCTCGTCCCA          |                     |
|            | Brachyury   | Forward                   | ACCACCTCCACATCCCACT         | 99                  |
|            |             | Reverse                   | CCACATGGATGCCAACCGAG        |                     |
|            | Gata4       | Forward                   | TTTCCCGCAGGCTTACCAG         | 122                 |
|            |             | Reverse                   | ACCAGTTTATGCCGTTATGATGTCC   |                     |
|            | Gapdh       | Forward                   | GAGGCCAGTTCTGTCCCTT         | 88                  |
|            |             | Reverse                   | ATCAGTTTCTATCAGCCTCTCC      |                     |
|            | c-myc       | Forward                   | AGGAGCACTGTAAGCCCAACAC      | 142                 |
|            |             | Reverse                   | ACCTGCCACTGTCCAACCTTAGCC    |                     |
| Sox3       | Forward     | CGCAACCGCTCCTAAAGCC       | 85                          |                     |
|            | Reverse     | GCGAACAAAACACTAGCCCAACCC  |                             |                     |
| Lin28b     | Forward     | TTTCAACAAGCCACTAGTTCTCA   | 104                         |                     |
|            | Reverse     | AGATGAATAGCCATACGTTCTTCCC |                             |                     |
| Tfcp2l1    | Forward     | CAAAGGAAGAAATGTAAGGCCAA   | 103                         |                     |
|            | Reverse     | ACTGCCATCTCCATTCTCTCG     |                             |                     |
| Nanog-like | Forward     | CAGCCAGTAGCAGTCTATCTGTGA  | 148                         |                     |
|            | Reverse     | AGCTGTTTGCATGAAGCACCGAA   |                             |                     |
| Sall4      | Forward     | CCCGAATCCTTTGCTACCTCAGTCC | 148                         |                     |
|            | Reverse     | CTCCTCTGCGCTCGATTGTCT     |                             |                     |
| Rex1       | Forward     | AGGAGCCTCGTGCCCAATTCCC    | 142                         |                     |
|            | Reverse     | CCTCTGCCTTCAAGCTCCCTGACC  |                             |                     |
| Sox17      | Forward     | TGGCGCAGCAGAACCAGGCTT     | 72                          |                     |
|            | Reverse     | ACAGCGCTTCCACGATTACCCA    |                             |                     |
| Gata6      | Forward     | GCGTGACCCACTGCCAGCAA      | 85                          |                     |
|            | Reverse     | ACCCTCCGAGAAAGAAACCC      |                             |                     |
| Otx2       | Forward     | CCCTGTTCCCAAGACCCGCTA     | 94                          |                     |
|            | Reverse     | AACCACACCTGCACTCTGGAC     |                             |                     |
| Pax6       | Forward     | AGCACAAAGCTTTACCAGCCGAT   | 90                          |                     |
|            | Reverse     | CGCTGTGTCTGTCTGCCAAC      |                             |                     |
| FGF2       | Forward     | ATCCGCACATCAAAGTGCAGCTTC  | 75                          |                     |
|            | Reverse     | AGCGGTTTGCACCTTACGCCTT    |                             |                     |
| Dnmt3b     | Forward     | GGTCCCCTCAGTCACATCCTC     | 105                         |                     |
|            | Reverse     | CTTTGTTTGCTTCCCAAGTCTC    |                             |                     |

Supplementary Table 7 Primer sequence information for real-time PCR (Okinawa rail)

| Species      | Gene name   | F/R                       | Sequence                 | Product length (bp) |
|--------------|-------------|---------------------------|--------------------------|---------------------|
| Okinawa rail | Pou5        | Forward                   | GCCGGACCAGCATTGAAACCAAC  | 79                  |
|              |             | Reverse                   | TCCTGGGGACTGGGCTTCACACA  |                     |
|              | Sox2        | Forward                   | ACCCGGAGGAAAACCAAGACC    | 153                 |
|              |             | Reverse                   | TGCGCGTAACTGTCCATCCTCT   |                     |
|              | Nanog       | Forward                   | CAGAGCGCCATCTCCCAT       | 75                  |
|              |             | Reverse                   | ACTTGGCCTTCTCACCACACC    |                     |
|              | Tbx3        | Forward                   | AGAAGGCCAAGTACATTTTGCTGA | 93                  |
|              |             | Reverse                   | CCTTGCCAGCGACCATCCAG     |                     |
|              | Klf4        | Forward                   | CCCGATCCGATGAACCTACTCGT  | 75                  |
|              |             | Reverse                   | TGTCACACCGCTGGCACT       |                     |
|              | Klf2        | Forward                   | ATTAAGCCCGAGCCTGACATGGAC | 91                  |
|              |             | Reverse                   | TCGCGTTGCCCTCCTGT        |                     |
|              | Lin28a      | Forward                   | TGAAGCCGTGGAGTTCACCTT    | 112                 |
|              |             | Reverse                   | CTTGCCCTTGGGTCTCCTCTCG   |                     |
|              | Esrrb       | Forward                   | TGGAAATCCTCATCTGGGCAT    | 75                  |
|              |             | Reverse                   | TGTAGTCTCAGCATAGACGAGCTT |                     |
|              | Fbx15       | Forward                   | AAATCTGAACAACAGAAACCGT   | 75                  |
|              |             | Reverse                   | TTTCTCCAGTACCCAGGCTT     |                     |
|              | Prdm14      | Forward                   | AGCAGAATCTGACGGCTATCCA   | 118                 |
|              |             | Reverse                   | CCCAGGAATGCACGTAGCAA     |                     |
|              | CDH1        | Forward                   | CGCTCAGCTCCCTCAACTCTCC   | 103                 |
|              |             | Reverse                   | CCGCCATAGAGGTCTGCCAGTTC  |                     |
|              | DDX4 (VASA) | Forward                   | CAACTCAGTGGCAGCAA        | 129                 |
|              |             | Reverse                   | TGCCGTGATTTCCACAACGA     |                     |
|              | Dazl        | Forward                   | AGTCTCAATCTCTGCACCAC     | 103                 |
|              |             | Reverse                   | ATACTGTGTTATGGGGCTCACCAC |                     |
|              | TERT        | Forward                   | TGAAGCTAACGACTCCAGCAC    | 133                 |
|              |             | Reverse                   | TGCTCATGTTCTGTACCCAT     |                     |
|              | LIF         | Forward                   | CATCTTCTCCCGCTTTCCG      | 111                 |
|              |             | Reverse                   | CGCGTGATGTTCCCAACGA      |                     |
|              | LIFR        | Forward                   | ACCCATGATACATCTGAGCAA    | 104                 |
|              |             | Reverse                   | ATCTTCAGACAGTATGCACACC   |                     |
|              | FGF3        | Forward                   | TGCCAAACAACATAAATGCTT    | 88                  |
|              |             | Reverse                   | TTGCCCTTCTTTGTCTTCCA     |                     |
|              | FGF5        | Forward                   | GAGCTTGCCCTCACCGTGACC    | 127                 |
|              |             | Reverse                   | ACCCAAGCGAAACTCAGCCGGTA  |                     |
|              | FGF8        | Forward                   | ACTGGCTTTCACAGAGATCGTCT  | 81                  |
|              |             | Reverse                   | AGGCCATGTACCAGCCCTCGT    |                     |
|              | FGF10       | Forward                   | TTCCCTCGTCTTCTCTCT       | 142                 |
|              |             | Reverse                   | CGCTAACCTTGCCGTCTTCTCG   |                     |
|              | Wnt3a       | Forward                   | AACTTTGTGAGCCCAACCT      | 103                 |
|              |             | Reverse                   | CGCAGCACAAAGGTCCACAACCA  |                     |
|              | Wnt5a       | Forward                   | TCCTGTAGCCTGAAGACCTGT    | 87                  |
|              |             | Reverse                   | AGCAGCACTATCGTATTTCTCT   |                     |
|              | Nestin      | Forward                   | TTCCCTGCTCCCGGTGGCTT     | 100                 |
|              |             | Reverse                   | TCTGTAGGTCTCCACCGCCCTT   |                     |
|              | Brachyury   | Forward                   | ACCACCTGCTGAGCGCCGTG     | 121                 |
|              |             | Reverse                   | AGCTCTTGAACCGCAGCCACA    |                     |
|              | Gata4       | Forward                   | TTTCCCGCAGGCTTACCAG      | 86                  |
|              |             | Reverse                   | AGCTAAGACCAGGCTGTCCA     |                     |
|              | Gapdh       | Forward                   | TTATCATCTCTGCCCCCTC      | 82                  |
|              |             | Reverse                   | ATTTTCAGAGACTGTCTACTTGT  |                     |
| c-myc        | Forward     | TGCTTCCCTCCACCGCCGACCA    | 142                      |                     |
|              | Reverse     | AGCCGCTCCACATGCAGTCCT     |                          |                     |
| Sox3         | Forward     | ACCTATATGAACCGCCTTCCACCT  | 103                      |                     |
|              | Reverse     | ATTTACCACCGAGCCATGGAG     |                          |                     |
| Lin28b       | Forward     | ACTTCTGCTTACCAGGGGA       | 136                      |                     |
|              | Reverse     | ACGCAGACAACCTACTCGAC      |                          |                     |
| Tfcp2l1      | Forward     | GCATCAGCACCGAATTTACTCCAC  | 141                      |                     |
|              | Reverse     | ACACTTGTATCTGGCAGCTTG     |                          |                     |
| Nanog-like   | Forward     | TGACGGCTGTAACCTCCACCAC    | 100                      |                     |
|              | Reverse     | GCCCCACATCCAGAGTGCTT      |                          |                     |
| Sall4        | Forward     | ATTGCAGCCCTGGAGAACCAA     | 88                       |                     |
|              | Reverse     | AGCCATTGCTCACTAGACTTCAAGC |                          |                     |
| Rex1         | Forward     | CAGCCTTTGCCATCCAGT        | 105                      |                     |
|              | Reverse     | GCGTTTCACTTCTTATCCCT      |                          |                     |
| Sox17        | Forward     | AGCACATGCAGGACCAACCCAAAC  | 94                       |                     |
|              | Reverse     | TGCTGCAGGAAGCCGCTCTCCAC   |                          |                     |
| Gata6        | Forward     | ACCAGTCTGAAAAGCAGCAAC     | 85                       |                     |
|              | Reverse     | TCACTCAGCCGTGGAGGTCA      |                          |                     |
| Otx2         | Forward     | ACCTACACCCAGGCATCAGGCTA   | 149                      |                     |
|              | Reverse     | ACCGGTTGGCACCCAT          |                          |                     |
| Pax6         | Forward     | CGAAACTGGCTCCATCAGACC     | 93                       |                     |
|              | Reverse     | CGTTTACTGCGCTATTTTGTCT    |                          |                     |
| FGF2         | Forward     | TCTTACTGCAAGAACGGCGGCTT   | 82                       |                     |
|              | Reverse     | AGGGTCGCTTCTCCCGGACG      |                          |                     |
| Dnmt3b       | Forward     | TGAAGTACAGGCAATTTATGCTT   | 145                      |                     |
|              | Reverse     | ATTGGTTTCTGTATCCTGCAT     |                          |                     |



Supplementary Table 8 Primer sequence information for real-time PCR (Japanese ptarmigan)

| Species            | Gene name   | F/R                       | Sequence                  | Product length (bp) |
|--------------------|-------------|---------------------------|---------------------------|---------------------|
| Japanese Ptarmigan | Pou5        | Forward                   | AAACCACCATCTGCCGCTTCG     | 103                 |
|                    |             | Reverse                   | TCCGTGTCTCTGCCTCGTTG      |                     |
|                    | Sox2        | Forward                   | CCCCGGAGGAAAACCAAGACCCTG  | 100                 |
|                    |             | Reverse                   | CCCTACCCCGGTCTGTCATGC     |                     |
|                    | Nanog       | Forward                   | GCACACCAGGTTACAGCAG       | 89                  |
|                    |             | Reverse                   | CCAAAGAACCCTCATCTCC       |                     |
|                    | Tbx3        | Forward                   | ACCGATGAGAGATCCAGTGATCCC  | 90                  |
|                    |             | Reverse                   | ACGGCGCTCATGGCAAAGTCC     |                     |
|                    | Klf4        | Forward                   | AACTCACTCGTCATTACCGAA     | 117                 |
|                    |             | Reverse                   | ATTAAAGTGCCTTTCATGTGT     |                     |
|                    | Klf2        | Forward                   | GGCCGCTCTCTCGTGACACC      | 87                  |
|                    |             | Reverse                   | TGGCCATAACTGTCCATGTCAGG   |                     |
|                    | Lin28a      | Forward                   | CTCCCCAGCCTTGCCCT         | 96                  |
|                    |             | Reverse                   | AGCTTTCATTGGCATTGGCTT     |                     |
|                    | Esrrb       | Forward                   | ACATGCTTAATGCCATCCCAG     | 89                  |
|                    |             | Reverse                   | TGCCTCACAGGAAGCCACACC     |                     |
|                    | Fbx15       | Forward                   | CTATTTCAGTTGTTTCCAGCA     | 118                 |
|                    |             | Reverse                   | TTTCTCCAGTATCCAGGCTT      |                     |
|                    | Prdm14      | Forward                   | TGTTTTCTCCTATGTAAAGATCCCC | 139                 |
|                    |             | Reverse                   | GTGCAAGACAGCTAGTACCTT     |                     |
|                    | CDH1        | Forward                   | GCCITCAGCATTATACCGACCC    | 92                  |
|                    |             | Reverse                   | CCCACACTGGAGCCATCGACA     |                     |
|                    | DDX4 (VASA) | Forward                   | TCAGTCTAGAAATTGGGCTT      | 127                 |
|                    |             | Reverse                   | TGACTGCCGTTACTTTGGTT      |                     |
|                    | Dazl        | Forward                   | ATAATAAAGTAAGGTGAGGCGTGA  | 100                 |
|                    |             | Reverse                   | CAAAATGGCCGCTCGCAGCAC     |                     |
|                    | TERT        | Forward                   | ACCAAAATACATCTTCCGCTCT    | 141                 |
|                    |             | Reverse                   | TCTATAAGTGCCTTCCACCT      |                     |
|                    | LIF         | Forward                   | TCGACCCGCTCCACAACACC      | 110                 |
|                    |             | Reverse                   | CTCCCCATAGCTCAGTCCAC      |                     |
|                    | LIFR        | Forward                   | CCGCAACAACAGACACC         | 144                 |
|                    |             | Reverse                   | CCACCTGAGATAACCCCA        |                     |
|                    | FGF3        | Forward                   | GCATCCCGTCTATACCGGACT     | 132                 |
|                    |             | Reverse                   | CTGTGCTCTGCGTGTITTAAGCC   |                     |
|                    | FGF5        | Forward                   | TTCAGATTGCAGCCTTCCA       | 91                  |
|                    |             | Reverse                   | ACAGCACAGAGTACCTCA        |                     |
|                    | FGF8        | Forward                   | GTTTGGCACCCTCACCCAT       | 85                  |
|                    |             | Reverse                   | ACCCGCTGCCTCACCGTA        |                     |
|                    | FGF10       | Forward                   | CCTTAAATGCTCATTCAAGCCTA   | 114                 |
|                    |             | Reverse                   | TCCATCTCCACAAGGCTTC       |                     |
|                    | Wnt3a       | Forward                   | ACAACCTCTTCAAGGCTCCGACT   | 148                 |
|                    |             | Reverse                   | AGGTCAAGCCATCAATCCCA      |                     |
|                    | Wnt5a       | Forward                   | TTCTGTAGCTGAAGACCTG       | 132                 |
|                    |             | Reverse                   | CTGTTCACTGCACCAGCTTG      |                     |
|                    | Nestin      | Forward                   | CCAACCAAGAGAGTCCAGCATC    | 89                  |
|                    |             | Reverse                   | ATCCTTCTGTCTTCTGTCTGCTT   |                     |
|                    | Brachyury   | Forward                   | GTTTCTCCCACTAGCTGGCAA     | 102                 |
|                    |             | Reverse                   | CTCCAGTACATTAGCACTTCG     |                     |
|                    | Gata4       | Forward                   | AAACGATAGAATTTGGCTAACTGG  | 142                 |
|                    |             | Reverse                   | ATTTCTACTATGAAAGGGCCGAGA  |                     |
|                    | Gapdh       | Forward                   | CCCTTTGTGGAGCCCTT         | 138                 |
|                    |             | Reverse                   | TTCTATCAGCCTCTCCACCT      |                     |
| c-myc              | Forward     | AGGAGCACTGTAAGCCCCACCAC   | 142                       |                     |
|                    | Reverse     | ACCCTGCCACTGTCCAACTTAGCC  |                           |                     |
| Sox3               | Forward     | GCACGACCGCTCCTAAAGCC      | 87                        |                     |
|                    | Reverse     | AGCGAACAAAACACTACGCCCAACC |                           |                     |
| Lin28b             | Forward     | GACATGAAGCTGAACCCCA       | 75                        |                     |
|                    | Reverse     | GAGATGAATAGCCATACGTTCC    |                           |                     |
| Tfcp2l1            | Forward     | ATCTTCAAGCAGGAGGAACCAC    | 116                       |                     |
|                    | Reverse     | AGGGTTTCTTCGTGACGTTT      |                           |                     |
| Nanog-like         | Forward     | AGTTCATGACCATTGGCAAG      | 127                       |                     |
|                    | Reverse     | ATATATCTGAGTCTGGTGCCAT    |                           |                     |
| Sall4              | Forward     | TCCCGAATCCTTTGCTACCTCAGT  | 150                       |                     |
|                    | Reverse     | GTCCTCCGATTTCGATTGCT      |                           |                     |
| Rex1               | Forward     | AGCAAAGCGTTCTAAGTTGTCC    | 134                       |                     |
|                    | Reverse     | ATTCATTGAAAATCCTGAGGCACT  |                           |                     |
| Sox17              | Forward     | TGGCGCAGCAGAACCCGGACCT    | 72                        |                     |
|                    | Reverse     | ACAGCGCCTTCCACGATTATCCAG  |                           |                     |
| Gata6              | Forward     | ACCTCTGTAAAGCCGCGAGT      | 78                        |                     |
|                    | Reverse     | AATCCCGGTGCCATCCCTCC      |                           |                     |
| Otx2               | Forward     | CCCATGACCTACACCCAGGCATC   | 82                        |                     |
|                    | Reverse     | ATCCACAGTCCATCCCTCCGAA    |                           |                     |
| Pax6               | Forward     | TAGCGACTCCCGAAGTTGTAAGCA  | 82                        |                     |
|                    | Reverse     | CTGTCTCGAATCTCCACGCAAA    |                           |                     |
| FGF2               | Forward     | TCAAATCCAGTTCAAGCAG       | 90                        |                     |
|                    | Reverse     | TGCCATCCTCTTCATAGCC       |                           |                     |
| Dnmt3b             | Forward     | ATTCACTACGTCCTTTTCCAAGCA  | 129                       |                     |
|                    | Reverse     | CAGAACATTTTCCCTCCGGTCA    |                           |                     |

Supplementary Table 9 Primer sequence information for real-time PCR (Blakiston's fish owl)

| Species              | Gene name   | F/R                      | Sequence                  | Product length (bp) |
|----------------------|-------------|--------------------------|---------------------------|---------------------|
| Blakiston's fish owl | Pou5        | Forward                  | AGAAAAACGACGACCAGCAT      | 78                  |
|                      |             | Reverse                  | ACTGGGCTTACGCACT          |                     |
|                      | Sox2        | Forward                  | CTCGCTTCTCTGCTCAAGGCTGGT  | 121                 |
|                      |             | Reverse                  | TTCGAGTTGCCGTGCCTCCC      |                     |
|                      | Nanog       | Forward                  | AGAGCCGCACAGCTTCTCCA      | 103                 |
|                      |             | Reverse                  | AAAACAGCCAGCTCCCGGAT      |                     |
|                      | Tbx3        | Forward                  | GGTATCCCCTTTTCTCCCTGGGTC  | 148                 |
|                      |             | Reverse                  | CCGTGCCTCTTTATGGAATTGCT   |                     |
|                      | Klf4        | Forward                  | GACCACCTTGCTTACACA        | 122                 |
|                      |             | Reverse                  | GTGTTCTCCCATCTTGC         |                     |
|                      | Klf2        | Forward                  | ACTTAGCCAGTCATCTCCT       | 99                  |
|                      |             | Reverse                  | CACAGAAGCTGCATAAATACCC    |                     |
|                      | Lin28a      | Forward                  | CCGCGAAAGCACAGCAGTCCC     | 75                  |
|                      |             | Reverse                  | AGTGTGCATATCCTCCTCGTCT    |                     |
|                      | Esrrb       | Forward                  | CGCCATCATGGAGGACTCAC      | 89                  |
|                      |             | Reverse                  | AAGCAATGTCCCACACACC       |                     |
|                      | Fbx15       | Forward                  | AATGAAATTGCTTTTGTATTGTGA  | 70                  |
|                      |             | Reverse                  | CAGAACCCAAAGTGTTCTC       |                     |
|                      | Prdm14      | Forward                  | CTCTGGCAACTGGATGTCCCT     | 92                  |
|                      |             | Reverse                  | CGTAGAAGATTGTCCCTGGCACT   |                     |
|                      | CDH1        | Forward                  | TGCTCCGCCCGAGGATGACA      | 75                  |
|                      |             | Reverse                  | CCTGATCTCCTCACGCCACCCT    |                     |
|                      | DDX4 (VASA) | Forward                  | GAGAACTCGCTCTTACGAT       | 75                  |
|                      |             | Reverse                  | GACCTCTTGCTGCCACT         |                     |
|                      | Dazl        | Forward                  | AAGTGACTAATACTGACCAGC     | 76                  |
|                      |             | Reverse                  | TAAAATACAACTCTGGGCAAA     |                     |
|                      | TERT        | Forward                  | TGGAGCAAAGCACAAACCAG      | 82                  |
|                      |             | Reverse                  | TGTCTCATTGCCAGTAGCG       |                     |
|                      | LIF         | Forward                  | GGCCTCATCTCAAACCTCACCT    | 143                 |
|                      |             | Reverse                  | TGCACGTACTCTCTGAGCACCT    |                     |
|                      | LIFR        | Forward                  | GACTCAGAAACGGAGAACCAC     | 105                 |
|                      |             | Reverse                  | CACCTGAGATGACCCACA        |                     |
|                      | FGF3        | Forward                  | CGCAGGAACTCTACTGTGCCACCA  | 84                  |
|                      |             | Reverse                  | GCTGTTTTTCTCCAGGGTGCCGTTG |                     |
|                      | FGF5        | Forward                  | ACACCTATGCCTCAGCTGCCACC   | 76                  |
|                      |             | Reverse                  | TTGCCCTCTTGTGAGTGCCACA    |                     |
|                      | FGF8        | Forward                  | ACTGTGTCTTACGGAGATCGTCT   | 82                  |
|                      |             | Reverse                  | AAGCCATGTACCCCTCG         |                     |
|                      | FGF10       | Forward                  | ATTAATATGCCATTACGAC       | 85                  |
|                      |             | Reverse                  | TCCTTATCTAGGTATCGTCT      |                     |
|                      | Wnt3a       | Forward                  | AACTTTGTGAGCCCAACCT       | 92                  |
|                      |             | Reverse                  | AGGTCGCAACCATCAATCCCA     |                     |
|                      | Wnt5a       | Forward                  | TTCAGTACATTTAGGGCTCTGCAA  | 117                 |
|                      |             | Reverse                  | GCTCTTACCCTCCGATGACA      |                     |
|                      | Nestin      | Forward                  | AGCAAGCAGCCGAGAAGAAGCCAA  | 139                 |
|                      |             | Reverse                  | TGCACCTCCAGCAAGGTTCCAC    |                     |
|                      | Brachyury   | Forward                  | ATCCCTCAATCTACGGTGTACTCT  | 80                  |
|                      |             | Reverse                  | ACATCCATGCTGTCAATGTGCC    |                     |
|                      | Gata4       | Forward                  | CACCGTCTTCTACTACCCAA      | 126                 |
|                      |             | Reverse                  | GCCCTAGACCATATCAATCCAC    |                     |
|                      | Gapdh       | Forward                  | CCTTTTACCACCGCTTAGCTCT    | 114                 |
|                      |             | Reverse                  | CTATCAGCCTCTCCACTCCC      |                     |
|                      | c-myc       | Forward                  | AGCTTCATCTGCGACCCGGACGAC  | 73                  |
|                      |             | Reverse                  | AGCCGCTCCACATGCAGTCT      |                     |
| Sox3                 | Forward     | TCACAGACCTTCTCCCTGC      | 89                        |                     |
|                      | Reverse     | TACGGTACCATTGACGCCAGT    |                           |                     |
| Lin28b               | Forward     | GCGAAGAATGTAGTCTACCTCC   | 135                       |                     |
|                      | Reverse     | TTCAGCTTCGTGCTTCCC       |                           |                     |
| Tfcp2l1              | Forward     | AACTTGACAGCATTTCTCCAC    | 80                        |                     |
|                      | Reverse     | TTGCTCACTAATACATGGATCCCT |                           |                     |
| Nanog-like           | Forward     | AACATCCAAACTGTGCCTCCC    | 87                        |                     |
|                      | Reverse     | GACTCCTCATCTTCGCTGGT     |                           |                     |
| Sall4                | Forward     | CGTCATCTTCCAAATCCGCTT    | 104                       |                     |
|                      | Reverse     | CGGTTGTCTCTCAGACACGCTA   |                           |                     |
| Rex1                 | Forward     | ACCCACTTTCAAATTACTCAGCC  | 89                        |                     |
|                      | Reverse     | ATAACTAGACACCTTACCCTT    |                           |                     |
| Sox17                | Forward     | GCAGCAAGAGCGAGGCGGGAT    | 70                        |                     |
|                      | Reverse     | TTGCGCTCGTCTTCCGCCACACC  |                           |                     |
| Gata6                | Forward     | CACCAGTCCCAGAAAGCAGCAA   | 102                       |                     |
|                      | Reverse     | TGCTCACAGATGCCGTCCT      |                           |                     |
| Otx2                 | Forward     | GCCCTTTTCGCCAAAACCCGCTAC | 70                        |                     |
|                      | Reverse     | GCAGGTTGATTTTACGCGCCACTC |                           |                     |
| Pax6                 | Forward     | TAGCGACTCCAGAAGTTGAAGCA  | 116                       |                     |
|                      | Reverse     | ATTATCGTTGGTACAGACCCC    |                           |                     |
| FGF2                 | Forward     | AGTCAAAGTCAACTTCAAGC     | 92                        |                     |
|                      | Reverse     | TGCCATCCTCTTCAATAGCC     |                           |                     |
| Dnmt3b               | Forward     | GCATGAAATACTCCGTTTTAGCC  | 108                       |                     |
|                      | Reverse     | ATTCGCTATAGTTCAAGTTTGGC  |                           |                     |

Supplementary Table 10. Primer information for qPCR

| Species               | Gene name  | F/R                     | Sequence                  | Product length (bp) |
|-----------------------|------------|-------------------------|---------------------------|---------------------|
| Japanese Golden Eagle | Sox3 like  | Forward                 | ACAACCTCCTGCCTCCTAGAAGCC  | 93                  |
|                       |            | Reverse                 | AGCGAATAAAACAGTGCCCAACC   |                     |
|                       | Nanog like | Forward                 | AGCAGAAAACCTTCAGGCTGTGACC | 107                 |
|                       |            | Reverse                 | CCCTCATCCTCCACAGCCACGAA   |                     |
|                       | Lin28a     | Forward                 | CGCCCGTCGATGTCTTCGTACACC  | 81                  |
|                       |            | Reverse                 | ACTCAACAGCTTCGCCCTCCTT    |                     |
|                       | Lin28b     | Forward                 | AGGAATCCCAGGTTTTGCAC      | 75                  |
|                       |            | Reverse                 | TGGAGATGAACCCGAATCCC      |                     |
|                       | Sox2       | Forward                 | CCCGGAGGAAAACCAAGACCCTCA  | 103                 |
|                       |            | Reverse                 | CCAACCCCTACCCCGGTCGTC     |                     |
|                       | Tert       | Forward                 | AGCAACAACCTACGCGTCCTC     | 100                 |
|                       |            | Reverse                 | GCTCCCAAGGGCTGAATCACAC    |                     |
|                       | Cdh1       | Forward                 | CACCGACCCAAAACCAACGA      | 102                 |
|                       |            | Reverse                 | ACAGCGTTCTCCACCGTTACCAG   |                     |
|                       | Sall4      | Forward                 | TGCCAGAAAACACCTGCGACA     | 145                 |
|                       |            | Reverse                 | TTTGAAGAACTCCTAGGGCCAT    |                     |
|                       | Esrrb      | Forward                 | ACCAAAATGAAATGCACACCAC    | 102                 |
|                       |            | Reverse                 | CTTAGGATCTTTTCTGCCCAT     |                     |
|                       | Fbxo15     | Forward                 | ATACCATCTTGCTAACGTGAC     | 90                  |
|                       |            | Reverse                 | ACTAAGAGTCTGGCTTCAGA      |                     |
|                       | Gapdh      | Forward                 | ACCATCTTCCAGGAGCGTGACCC   | 134                 |
|                       |            | Reverse                 | ACACGCTTAGCACCACCCTT      |                     |
|                       | Nestin     | Forward                 | AAGCAACCGAAGCAGGCAAA      | 83                  |
|                       |            | Reverse                 | TAAATGCCTCAAAGTGCCCTTCGT  |                     |
|                       | Pax6       | Forward                 | GGACCCACTATCCCAGTGTGT     | 141                 |
|                       |            | Reverse                 | CTGTCTCCGCTGGTTCCTCA      |                     |
|                       | Otx2       | Forward                 | ACGCTCCAGTTTITAGTCAGGT    | 124                 |
|                       |            | Reverse                 | AGTCTGAACGGGATCACACCA     |                     |
| Brachyury             | Forward    | CAGCACCGGCACAGCTACCAG   | 101                       |                     |
|                       | Reverse    | CGTTGGACATCCCGCTCGACT   |                           |                     |
| Gata4                 | Forward    | GCCACCATCTTCTCATTACCCAA | 114                       |                     |
|                       | Reverse    | CAAATCCGCTAAAGCCACCAC   |                           |                     |
| Gata6                 | Forward    | ACCAGTCCCAGAAAGCAGCAAC  | 103                       |                     |
|                       | Reverse    | CCTGTCTCACCGATGCCGTCA   |                           |                     |

Supplementary Table 11 Primer sequence information for genomic PCR (Figure 8f)

| Species              | Gene name | F/R     | Sequence                 | Product length (bp) |
|----------------------|-----------|---------|--------------------------|---------------------|
| Chicken              | Tsc2      | Forward | CCGTTTGCTTGCCCTCTGATGACT | 294                 |
|                      |           | Reverse | CAGCTCAGTGTTGTTCTCGGCATT |                     |
| Reprogramming vector | PB-TAD-7F | Forward | CAGCCCCAGTCGAGTACCCAT    | 250                 |
|                      |           | Reverse | TCCTCCCCGAAGTTGTGCAGT    |                     |

Supplementary Table 12 Primer sequence information for real-time PCR (Figure 8g, h)

| Species              | Gene name | F/R     | Sequence                            | Product length (bp) |
|----------------------|-----------|---------|-------------------------------------|---------------------|
| Chicken              | Tsc2      | Forward | TCTGTAAGCCCAAAGAATAAGCA             | 117                 |
|                      |           | Reverse | AGCTTATCACCCACACCA                  |                     |
|                      |           | probe   | [FAM]CACACAGCACCTTAGCTAGAGCAC[BHQ1] |                     |
| Reprogramming vector | PB-TAD-7F | Forward | GACAACAATTTGCCGGTTCGAGG             | 91                  |
|                      |           | Reverse | GGCTTCTTCCACCACTTCTCCA              |                     |
|                      |           | probe   | [FAM]ACATGTGCAAGCTGAGGCCACT[BHQ1]   |                     |

### Supplementary references

1. Katayama M, *et al.* Induced pluripotent stem cells with six reprogramming factors from Prairie Vole, which is an animal model for social behaviors. *Cell Transplant* **25**, 783-796 (2016).
2. Katayama M, *et al.* Immortalized prairie vole-derived fibroblasts (VMF-K4DTs) can be transformed into pluripotent stem cells and provide a useful tool with which to determine optimal reprogramming conditions. *J Reprod Dev* **63**, 311-318 (2017).
