# Supplementary material for: Induced pluripotent stem cells of endangered avian species
Source: PubMed Central journal article supplement (PMC9592614; doi:10.1038/s42003-022-03964-y), 2022-10-24
Supplement: 42003_2022_3964_MOESM3_ESM.pdf [file 42003_2022_3964_MOESM3_ESM.pdf]

## Description of Additional Supplementary Files

**File name:** Supplementary Data

**Description:** All source data underlying the graphs presented in the main figures.
